# Supplementary material for: A Potential Lead for Insect Growth Regulator: Design, Synthesis, and Biological Activity Evaluation of Novel Hexacyclic Pyrazolamide Derivatives
Source: MDPI journal article supplement (doi:10.3390/molecules28093741), 2023-04-26

## Supplementary Material

### A Potential Lead for Insect Growth Regulator: Design, Synthesis, and Biological Activity Evaluation of Novel Hexacyclic Pyrazolamide Derivatives

Bingbo Guo, Biaobiao Jiang, Chunying Wang, Xiaoyu Jin, Liuyang Wang, Zhaokai Yang, Shihui Luo, Qing Yang, Li Zhang and Xinling Yang

#### Content

|                                                                                                                   |    |
|-------------------------------------------------------------------------------------------------------------------|----|
| <b>Table S1.</b> The price and manufacturer of the starting reagents.....                                         | 2  |
| <b>Table S2.</b> Comparison of the yields of hexacyclic and heptacyclic intermediates.....                        | 2  |
| <b>Table S3.</b> Comparison of the yields of hexacyclic and heptacyclic compounds.....                            | 2  |
| <b>Figure S1.</b> Predicted binding modes of <b>6f</b> and <b>D-27</b> with EcR and <i>Of</i> ChtI.....           | 3  |
| <b>Figure S2.</b> Predicted binding modes of <b>6b</b> , <b>6j</b> and <b>6n</b> with EcR and <i>Of</i> ChtI..... | 3  |
| <b>Figure S3.</b> The HPLC chromatogram of <b>6j</b> .....                                                        | 4  |
| <b>Table S4.</b> Elution gradient and analysis conditions of HPLC.....                                            | 4  |
| Physical and chemical properties, NMR and HRMS spectra data of <b>6a~6x</b> .....                                 | 5  |
| <sup>1</sup> H NMR and <sup>13</sup> C NMR spectra of target compounds .....                                      | 8  |
| HRMS spectra of target compounds ... ..                                                                           | 32 |

**Table S1.** The price and manufacturer of the starting reagents (From Chemical Book)

| Reagent.       | Price        | Manufacturer | Reagent.       | Price       | Manufacturer   |
|----------------|--------------|--------------|----------------|-------------|----------------|
| Cyclohexanone  | ¥ 49 /500mL  | Macklin      | Cyclohexanone  | ¥ 69 /1L    | J&K Scientific |
| Cycloheptanone | ¥ 1802/500mL | Macklin      | Cycloheptanone | ¥ 378 /0.1L | J&K Scientific |

**Table S2.** Comparison of the yields of hexacyclic and heptacyclic intermediates [1]

| Intermediates (hexacyclic) <sup>a</sup> | yield (%) | Intermediates (heptacyclic) <sup>b</sup> | yield (%) |
|-----------------------------------------|-----------|------------------------------------------|-----------|
| Intermediate 3 <sup>a</sup>             | 75        | Intermediate 3 <sup>b</sup>              | 68        |
| Intermediate 4 <sup>a</sup>             | 58        | Intermediate 4 <sup>b</sup>              | 50        |

“a” represents the intermediate synthesized in this work; “b” represents the intermediate synthesized in our previous work [1]. Intermediate 3<sup>b</sup> represents ethyl 2-oxo-2-(2-oxocycloheptyl) acetate. Intermediate 4<sup>b</sup> represents ethyl 2-phenyl-2,4,5,6,7,8-hexahydrocyclohepta[c]pyrazol-6-carboxylate

**Table S3.** Comparison of the yields of hexacyclic and heptacyclic compounds [1].

| Compd <sup>a</sup> . | R                  | yield (%) | Compd <sup>b</sup> . | R                  | yield (%) |
|----------------------|--------------------|-----------|----------------------|--------------------|-----------|
| 6a                   | 3-Br               | 48        | D-08                 | 3-Br               | 22        |
| 6b                   | 4-Br               | 56        | D-09                 | 4-Br               | 49        |
| 6c                   | 3-Et               | 59        | D-23                 | 3-Et               | 54        |
| 6d                   | 4-Et               | 72        | D-24                 | 4-Et               | 64        |
| 6e                   | 4-OCH <sub>3</sub> | 56        | D-15                 | 4-OCH <sub>3</sub> | 16        |
| 6f                   | 4-tBu              | 76        | D-27                 | 4-tBu              | 74        |

“a” represents the compound synthesized in this work; “b” represents the compound synthesized in our previous work [1].

[1] Jiang, B.; Jin, X.; Dong, Y.; Guo, B.; Cui, L.; Deng, X.; Zhang, L.; Yang, Q.; Li, Y.; Yang, X.; Smagghe, G. Design, Synthesis, and Biological Activity of Novel Heptacyclic Pyrazolamide Derivatives: A New Candidate of Dual-Target Insect Growth Regulators. *J Agric Food Chem.* **2020**, *68*, 6347-6354.

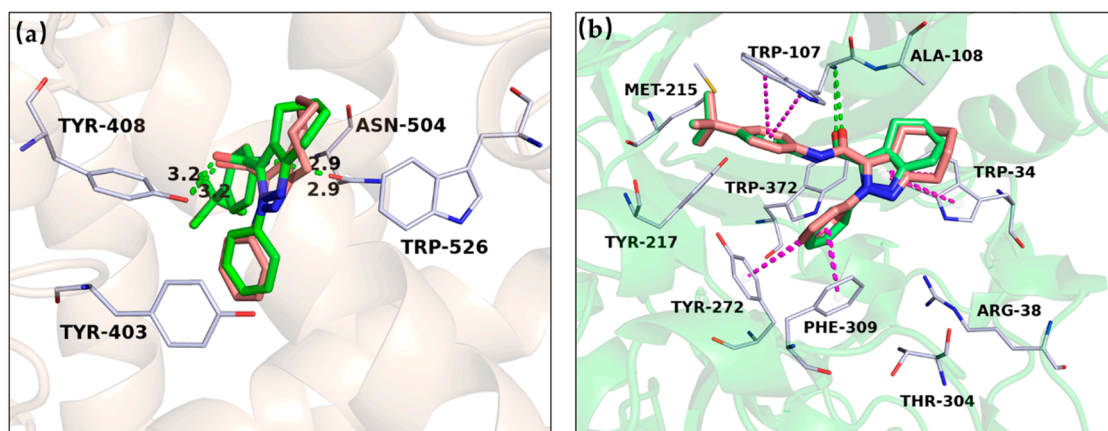

**Figure S1.** Predicted binding modes of **6f** and **D-27** with EcR and OfChtI. (a) Superimposed conformations of the **6f** (green) and **D-27** (red) with EcR; (b) Superimposed conformations of the **6f** (green) and **D-27** (red) with OfChtI.

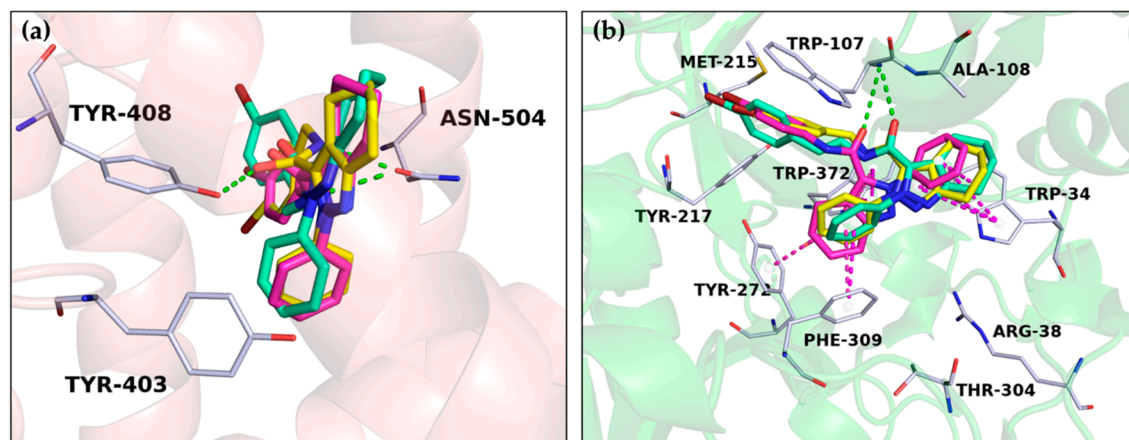

**Figure S2.** Predicted binding modes of **6b**, **6j**, and **6u** with EcR and OfChtI. (a) Superimposed conformations of the **6b** (purple) **6j** (yellow) and **6u** (cyan) with EcR; (b) **6b** (purple) **6j** (yellow) and **6u** (cyan) with OfChtI.

### The HPLC chromatogram of 6j.

The samples were analyzed using an Agilent 1290 high-performance liquid chromatography system (Agilent Technologies, Santa Clara, CA, USA). Analysis conditions are listed in **Table S4**.

**Table S4.** Elution gradient and analysis conditions of HPLC.

| Time (min) | Flow (mL/min) | A%   | B%   |
|------------|---------------|------|------|
| 0          | 0.3           | 90.0 | 10.0 |
| 1.0        | 0.3           | 90.0 | 10.0 |
| 2.5        | 0.3           | 10.0 | 90.0 |
| 4.0        | 0.3           | 10.0 | 90.0 |
| 4.1        | 0.3           | 90.0 | 10.0 |
| 5.0        | 0.3           | 90.0 | 10.0 |

A: Acetonitrile

B: 0.2% formic acid aqueous solution

Column: Agilent Poroshell 120 EC-C18 (2.1 mm × 100 mm, particle size 1.9 μm)

(a) The HPLC chromatogram of 6j (0.01mg/L)

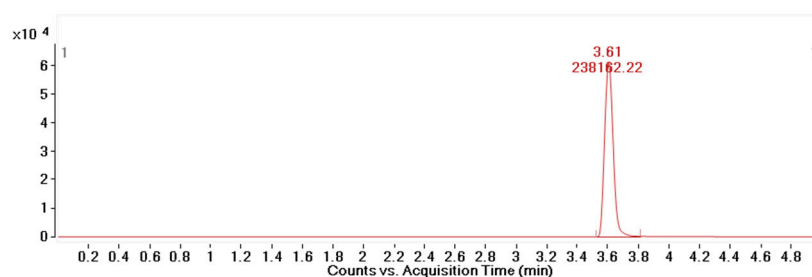

(b) The HPLC chromatogram of 6j (0.1mg/L)

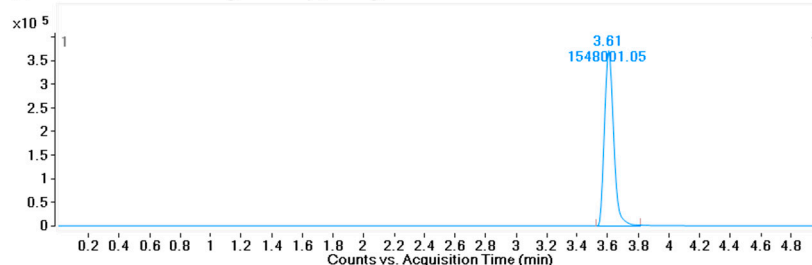

(c) The HPLC chromatogram of 6j (1mg/L)

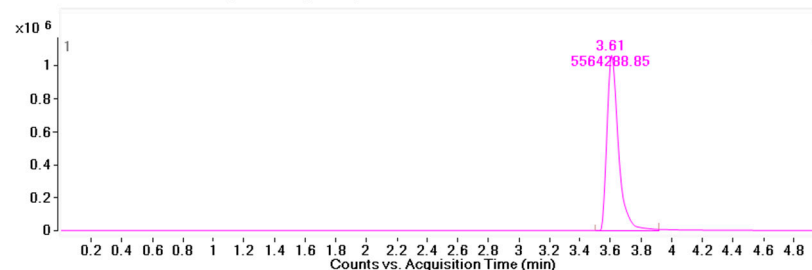

**Figure S3.** The HPLC chromatogram of 6j. (a) The HPLC chromatogram of 6j (0.01 mg/L); (b) The HPLC chromatogram of 6j (0.1 mg/L); (c) The HPLC chromatogram of 6j (1 mg/L).

## Physical and chemical properties, NMR and HRMS spectra data of 6a~6x

(N-(3-bromophenyl)-2-phenyl-4,5,6,7-tetrahydro-2H-indazole-5-carboxamide) (**6a**): white solid, yield 48%, m.p. 168-169 °C. <sup>1</sup>H NMR (500 MHz, DMSO-*d*<sub>6</sub>) δ 7.98 (t, *J* = 9.0 Hz, 1H), 7.77–7.28 (m, 9H), 2.73 (t, *J* = 6.1 Hz, 2H), 2.63 (t, *J* = 6.1 Hz, 2H), 1.81–1.67 (m, 4H). <sup>13</sup>C NMR (126 MHz, DMSO-*d*<sub>6</sub>) δ 161.11, 149.75, 141.24, 130.34, 128.83, 128.29, 128.08, 127.86, 125.98, 124.96, 123.19, 119.70, 110.02, 23.26, 22.94, 22.92, 22.33. HRMS (ESI) calcd for C<sub>20</sub>H<sub>18</sub>BrN<sub>3</sub>O (M+H)<sup>+</sup> 396.0706, found 396.0709.

N-(4-bromophenyl)-2-phenyl-4,5,6,7-tetrahydro-2H-indazole-5-carboxamide (**6b**): white solid, yield 56%, m.p. 226-227 °C. <sup>1</sup>H NMR (500 MHz, CDCl<sub>3</sub>) δ 7.43–7.26 (m, 7H), 7.20–7.08 (m, 3H), 2.75 (t, *J* = 5.9 Hz, 2H), 2.68 (t, *J* = 6.1 Hz, 2H), 1.83–1.71 (m, 4H). <sup>13</sup>C NMR (126 MHz, CDCl<sub>3</sub>) δ 157.02, 149.58, 138.86, 135.22, 131.66, 131.01, 128.29, 127.39, 124.00, 120.29, 120.06, 116.37, 22.26, 21.93, 21.82, 20.79. HRMS (ESI) calcd for C<sub>20</sub>H<sub>18</sub>BrN<sub>3</sub>O (M+H)<sup>+</sup> 396.0706, found 396.0706.

N-(3-ethylphenyl)-2-phenyl-4,5,6,7-tetrahydro-2H-indazole-5-carboxamide Chemical Formula (**6c**): white solid, yield 59%, m.p. 154-155 °C. <sup>1</sup>H NMR (500 MHz, DMSO-*d*<sub>6</sub>) δ 10.46 (s, 1H), 7.55–7.39 (m, 6H), 7.36–7.19 (m, 2H), 6.96 (d, *J* = 7.6 Hz, 1H), 2.69 (t, *J* = 5.1 Hz, 4H), 2.57 (q, *J* = 7.6 Hz, 2H), 1.84–1.71 (m, 4H), 1.16 (t, *J* = 7.6 Hz, 3H). <sup>13</sup>C NMR (126 MHz, DMSO-*d*<sub>6</sub>) δ 159.56, 149.66, 144.88, 140.35, 139.03, 134.85, 129.49, 129.17, 127.40, 124.03, 123.27, 119.50, 118.79, 117.62, 28.70, 23.32, 23.15, 23.00, 20.66, 15.95. HRMS (ESI) calcd for C<sub>22</sub>H<sub>23</sub>N<sub>3</sub>O (M+H)<sup>+</sup> 346.1914, found 346.1916.

N-(4-ethylphenyl)-2-phenyl-4,5,6,7-tetrahydro-2H-indazole-5-carboxamide (**6d**): white solid, yield 72%, m.p. 189-190 °C. <sup>1</sup>H NMR (500 MHz, DMSO-*d*<sub>6</sub>) δ 10.45 (s, 1H), 7.55–7.41 (m, 6H), 7.34–7.27 (m, 1H), 7.16 (d, *J* = 8.3 Hz, 2H), 2.71–2.63 (m, 4H), 2.55 (q, *J* = 7.6 Hz, 2H), 1.85–1.70 (m, 4H), 1.15 (t, *J* = 6.3 Hz, 3H). <sup>13</sup>C NMR (126 MHz, DMSO-*d*<sub>6</sub>) δ 159.44, 149.66, 140.35, 140.09, 136.71, 134.89, 129.47, 128.46, 127.36, 123.19, 120.25, 118.70, 28.13, 23.32, 23.15, 23.01, 20.63, 16.24. HRMS (ESI) calcd for C<sub>22</sub>H<sub>23</sub>N<sub>3</sub>O (M+H)<sup>+</sup> 346.1914, found 346.1915.

N-(4-methoxyphenyl)-2-phenyl-4,5,6,7-tetrahydro-2H-indazole-5-carboxamide (**6e**): white solid, yield 56%, m.p. 210-221 °C. <sup>1</sup>H NMR (500 MHz, DMSO-*d*<sub>6</sub>) δ 10.38 (s, 1H), 7.57–7.40 (m, 6H), 7.36–7.27 (m, 1H), 6.90 (d, *J* = 8.8 Hz, 2H), 3.73 (d, *J* = 3.1 Hz, 3H), 2.73–2.62 (m, 4H), 1.86–1.68 (m, 4H). <sup>13</sup>C NMR (126 MHz, DMSO-*d*<sub>6</sub>) δ 159.20, 156.31, 149.65, 140.37, 134.93, 132.12, 129.47, 127.34, 123.17, 121.72, 118.61, 114.41, 55.71, 23.33, 23.16, 23.02, 20.64. HRMS (ESI) calcd for C<sub>21</sub>H<sub>21</sub>N<sub>3</sub>O<sub>2</sub> (M+H)<sup>+</sup> 348.1707, found 348.1708.

N-(4-(tert-butyl)phenyl)-2-phenyl-4,5,6,7-tetrahydro-2H-indazole-5-carboxamide (**6f**): white solid, yield 76%, m.p. 155-156 °C. <sup>1</sup>H NMR (500 MHz, DMSO-*d*<sub>6</sub>) δ 10.45 (s, 1H), 7.54 (d, *J* = 8.6 Hz, 2H), 7.45–7.41 (m, 4H), 7.36–7.28 (m, 3H), 2.68 (q, *J* = 6.2 Hz, 4H), 1.85–1.71 (m, 4H), 1.26 (s, 9H). <sup>13</sup>C NMR (126 MHz, DMSO-*d*<sub>6</sub>) δ 159.46, 149.66, 146.97, 140.34, 136.46, 134.89, 129.48, 127.35, 125.88, 123.16, 119.92, 118.69, 34.54, 31.63, 23.33, 23.16, 23.02, 20.61. HRMS (ESI) calcd for C<sub>24</sub>H<sub>27</sub>N<sub>3</sub>O (M+H)<sup>+</sup> 374.2227, found 374.2224.

N-(3-fluorobenzyl)-2-phenyl-4,5,6,7-tetrahydro-2H-indazole-5-carboxamide (**6g**): white solid, yield 64%, m.p. 214-215 °C. <sup>1</sup>H NMR (500 MHz, DMSO-*d*<sub>6</sub>) δ 9.02 (t, *J* = 6.0 Hz, 1H), 7.42–7.28 (m, 6H), 7.15–7.02 (m, 3H), 4.41 (d, *J* = 6.0 Hz, 2H), 2.68–2.57 (m, 4H), 1.82–1.67 (m, 4H). <sup>13</sup>C NMR (126 MHz, DMSO-*d*<sub>6</sub>) δ 162.64 (d, *J* = 243.2 Hz), 161.32, 149.56, 142.41 (d, *J* = 7.2 Hz), 140.41, 134.56, 130.73 (d, *J* = 8.7 Hz), 129.25, 127.33, 123.84 (d, *J* = 2.8 Hz), 123.40, 118.22, 114.52 (d, *J* = 21.7 Hz), 114.15 (d, *J* = 20.9 Hz), 42.52, 23.30, 23.14, 23.04, 20.70. HRMS (ESI) calcd for C<sub>21</sub>H<sub>20</sub>FN<sub>3</sub>O (M+H)<sup>+</sup> 350.1663, found 350.1661.

N-(4-fluorobenzyl)-2-phenyl-4,5,6,7-tetrahydro-2H-indazole-5-carboxamide (**6h**): white solid, yield 68%, m.p. 189-190 °C. <sup>1</sup>H NMR (500 MHz, DMSO-*d*<sub>6</sub>) δ 8.99 (t, *J* = 6.0 Hz, 1H), 7.40–7.27 (m, 7H), 7.19–7.13 (m, 2H), 4.37 (d, *J* = 6.0 Hz, 2H), 2.67–2.58 (m, 4H), 1.81–1.66 (m, 4H). <sup>13</sup>C NMR (126 MHz, DMSO-*d*<sub>6</sub>) δ 161.30, 149.53, 140.48, 137.66, 134.48, 132.91, 129.54, 129.50, 129.32, 128.18, 127.37, 123.59, 122.90, 118.34, 43.42, 23.32, 23.15, 23.07, 20.79. HRMS (ESI) calcd for C<sub>21</sub>H<sub>20</sub>FN<sub>3</sub>O (M+H)<sup>+</sup> 350.1663, found 350.1665.

N-(3-bromobenzyl)-2-phenyl-4,5,6,7-tetrahydro-2H-indazole-5-carboxamide (**6i**): white solid, yield 64%, m.p. 217-218 °C. <sup>1</sup>H NMR (500 MHz, DMSO-*d*<sub>6</sub>) δ 9.02 (t, *J* = 6.1 Hz, 1H), 7.52–7.24

(m, 9H), 4.39 (d,  $J$  = 6.1 Hz, 2H), 2.68–2.59 (m, 4H), 1.82–1.68 (m, 4H).  $^{13}\text{C}$  NMR (126 MHz, DMSO- $d_6$ )  $\delta$  161.30, 149.58, 142.30, 140.37, 134.48, 130.99, 130.57, 130.24, 129.29, 127.33, 126.94, 123.32, 122.07, 118.27, 42.42, 23.29, 23.14, 23.03, 20.73. HRMS (ESI) calcd for  $\text{C}_{21}\text{H}_{20}\text{BrN}_3\text{O}$  ( $\text{M}+\text{H}$ ) $^+$  410.0863, found 410.0859.

N-(4-bromobenzyl)-2-phenyl-4,5,6,7-tetrahydro-2H-indazole-5-carboxamide (**6j**): white solid, yield 65%, m.p. 220–221 °C.  $^1\text{H}$  NMR (500 MHz, DMSO- $d_6$ )  $\delta$  8.93 (t,  $J$  = 6.0 Hz, 1H), 7.46 (d,  $J$  = 8.3 Hz, 2H), 7.35–7.21 (m, 5H), 7.15 (d,  $J$  = 8.3 Hz, 2H), 4.28 (d,  $J$  = 6.0 Hz, 2H), 2.62–2.49 (m, 4H), 1.75–1.60 (m, 4H).  $^{13}\text{C}$  NMR (151 MHz, DMSO- $d_6$ )  $\delta$  161.24, 149.54, 140.40, 138.92, 134.54, 131.65, 130.13, 129.29, 127.32, 123.38, 120.42, 118.21, 42.39, 23.29, 23.14, 23.04, 20.69. HRMS (ESI) calcd for  $\text{C}_{21}\text{H}_{20}\text{BrN}_3\text{O}$  ( $\text{M}+\text{H}$ ) $^+$  410.0863, found 410.0864.

2-phenyl-N-(3-(trifluoromethoxy)benzyl)-4,5,6,7-tetrahydro-2H-indazole-5-carboxamide (**6k**): white solid, yield 60%, m.p. 198–199 °C.  $^1\text{H}$  NMR (500 MHz, DMSO- $d_6$ )  $\delta$  9.05 (t,  $J$  = 6.1 Hz, 1H), 7.48 (t,  $J$  = 7.8 Hz, 1H), 7.39–7.24 (m, 8H), 4.44 (d,  $J$  = 6.1 Hz, 2H), 2.68–2.59 (m, 4H), 1.83–1.67 (m, 4H).  $^{13}\text{C}$  NMR (126 MHz, DMSO- $d_6$ )  $\delta$  161.30, 149.54, 146.60, 140.44, 134.41, 131.54, 129.96, 129.40, 129.29, 127.93, 127.33, 123.48, 121.11, 118.35, 37.52, 23.30, 23.13, 23.04, 20.67. HRMS (ESI) calcd for  $\text{C}_{22}\text{H}_{20}\text{F}_3\text{N}_3\text{O}_2$  ( $\text{M}+\text{H}$ ) $^+$  416.1580, found 416.1583.

2-phenyl-N-(4-(trifluoromethoxy)benzyl)-4,5,6,7-tetrahydro-2H-indazole-5-carboxamide (**6l**): white solid, yield 72%, m.p. 214–215 °C.  $^1\text{H}$  NMR (500 MHz, DMSO- $d_6$ )  $\delta$  8.98 (t,  $J$  = 5.9 Hz, 1H), 7.44–7.29 (m, 9H), 4.47 (d,  $J$  = 5.9 Hz, 2H), 2.69–2.60 (m, 4H), 1.81–1.69 (m, 4H).  $^{13}\text{C}$  NMR (126 MHz, DMSO- $d_6$ )  $\delta$  161.27, 149.55, 147.71, 140.39, 138.96, 134.54, 129.72, 129.24, 127.28, 123.37, 121.44, 118.21, 42.32, 23.29, 23.14, 23.04, 20.69. HRMS (ESI) calcd for  $\text{C}_{22}\text{H}_{20}\text{F}_3\text{N}_3\text{O}_2$  ( $\text{M}+\text{H}$ ) $^+$  416.1580, found 416.1583.

N-(3-methylbenzyl)-2-phenyl-4,5,6,7-tetrahydro-2H-indazole-5-carboxamide (**6m**): white solid, yield 77%, m.p. 200–201 °C.  $^1\text{H}$  NMR (500 MHz, DMSO- $d_6$ )  $\delta$  8.88 (t,  $J$  = 5.8 Hz, 1H), 7.40–7.28 (m, 5H), 7.21–7.11 (m, 4H), 4.37 (d,  $J$  = 5.8 Hz, 2H), 2.67–2.58 (m, 4H), 2.26 (s, 3H), 1.81–1.67 (m, 4H).  $^{13}\text{C}$  NMR (126 MHz, DMSO- $d_6$ )  $\delta$  161.20, 149.52, 140.44, 139.33, 137.80, 134.71, 129.26, 128.68, 128.43, 127.98, 127.24, 124.91, 123.30, 118.14, 42.91, 23.31, 23.16, 23.05, 21.51, 20.72. HRMS (ESI) calcd for  $\text{C}_{22}\text{H}_{23}\text{N}_3\text{O}$  ( $\text{M}+\text{H}$ ) $^+$  346.1914, found 346.1915.

N-(4-methylbenzyl)-2-phenyl-4,5,6,7-tetrahydro-2H-indazole-5-carboxamide (**6n**): white solid, yield 72%, m.p. 201–202 °C.  $^1\text{H}$  NMR (500 MHz, DMSO- $d_6$ )  $\delta$  8.94 (t,  $J$  = 6.0 Hz, 1H), 7.40–7.28 (m, 5H), 7.18–7.10 (m, 4H), 4.34 (d,  $J$  = 6.0 Hz, 2H), 2.68–2.57 (m, 4H), 2.29 (s, 3H), 1.81–1.67 (m, 4H).  $^{13}\text{C}$  NMR (126 MHz, DMSO- $d_6$ )  $\delta$  161.15, 149.50, 140.43, 136.44, 136.40, 134.73, 129.30, 129.27, 127.84, 127.23, 123.29, 118.10, 42.70, 23.30, 23.16, 23.05, 21.16, 20.69. HRMS (ESI) calcd for  $\text{C}_{22}\text{H}_{23}\text{N}_3\text{O}$  ( $\text{M}+\text{H}$ ) $^+$  346.1914, found 346.1913.

N-(4-ethylbenzyl)-2-phenyl-4,5,6,7-tetrahydro-2H-indazole-5-carboxamide (**6o**): white solid, yield 57%, m.p. 177–178 °C.  $^1\text{H}$  NMR (500 MHz, DMSO- $d_6$ )  $\delta$  8.95 (t,  $J$  = 6.0 Hz, 1H), 7.41–7.27 (m, 5H), 7.20–7.12 (m, 4H), 4.35 (d,  $J$  = 6.0 Hz, 2H), 2.68–2.55 (m, 6H), 1.81–1.66 (m, 4H), 1.17 (t,  $J$  = 7.6 Hz, 3H).  $^{13}\text{C}$  NMR (126 MHz, DMSO- $d_6$ )  $\delta$  161.17, 149.50, 142.87, 140.44, 136.64, 134.74, 129.26, 128.13, 127.89, 127.20, 123.28, 118.09, 42.74, 28.32, 23.31, 23.16, 23.05, 20.70, 16.22. HRMS (ESI) calcd for  $\text{C}_{23}\text{H}_{25}\text{N}_3\text{O}$  ( $\text{M}+\text{H}$ ) $^+$  360.2070, found 360.2071.

N-(4-methoxybenzyl)-2-phenyl-4,5,6,7-tetrahydro-2H-indazole-5-carboxamide (**6p**): white solid, yield 86%, m.p. 181–182 °C.  $^1\text{H}$  NMR (300 MHz, DMSO)  $\delta$  8.94 (t,  $J$  = 6.0 Hz, 1H), 7.43–7.17 (m, 7H), 6.91 (d,  $J$  = 8.6 Hz, 2H), 4.34 (d,  $J$  = 6.0 Hz, 2H), 3.76 (s, 3H), 2.70–2.57 (m, 4H), 1.85–1.66 (m, 4H).  $^{13}\text{C}$  NMR (151 MHz, DMSO- $d_6$ )  $\delta$  161.08, 158.74, 149.49, 140.40, 134.73, 131.38, 129.27, 129.20, 127.20, 123.22, 118.07, 114.15, 55.55, 42.40, 23.30, 23.15, 23.04, 20.67. HRMS (ESI) calcd for  $\text{C}_{22}\text{H}_{23}\text{N}_3\text{O}_2$  ( $\text{M}+\text{H}$ ) $^+$  362.1863, found 362.1864.

N-(4-(tert-butyl)benzyl)-2-phenyl-4,5,6,7-tetrahydro-2H-indazole-5-carboxamide (**6q**): white solid, yield 84%, m.p. 162–163 °C.  $^1\text{H}$  NMR (300 MHz, DMSO- $d_6$ )  $\delta$  8.95 (t,  $J$  = 5.9 Hz, 1H), 7.48–7.26 (m, 7H), 7.21 (d,  $J$  = 8.2 Hz, 2H), 4.37 (d,  $J$  = 6.0 Hz, 2H), 2.75–2.56 (m, 4H), 1.88–1.65 (m, 4H), 1.30 (s, 9H).  $^{13}\text{C}$  NMR (151 MHz, DMSO- $d_6$ )  $\delta$  161.18, 149.75, 149.49, 140.41, 136.33, 134.72, 129.25, 127.59, 127.17, 125.49, 123.25, 118.08, 42.66, 34.67, 31.66, 23.30, 23.16, 23.05, 20.71. HRMS (ESI) calcd for  $\text{C}_{25}\text{H}_{29}\text{N}_3\text{O}$  ( $\text{M}+\text{H}$ ) $^+$  388.2383, found 388.2382.

N-(3-fluorophenethyl)-2-phenyl-4,5,6,7-tetrahydro-2H-indazole-5-carboxamide (**6r**): white solid, yield 68%, m.p. 165–166 °C.  $^1\text{H}$  NMR (500 MHz, DMSO- $d_6$ )  $\delta$  8.47 (t,  $J$  = 5.5 Hz, 1H), 7.44–

7.25 (m, 6H), 7.11–7.03 (m, 3H), 3.50 (dd,  $J = 12.7, 6.7$  Hz, 2H), 2.84 (t,  $J = 6.9$  Hz, 2H), 2.62 (t,  $J = 6.2$  Hz, 2H), 2.47 (t,  $J = 6.1$  Hz, 2H), 1.80–1.64 (m, 4H).  $^{13}\text{C}$  NMR (126 MHz,  $\text{DMSO-}d_6$ )  $\delta$  162.68 (d,  $J = 243.0$  Hz), 161.04, 149.42, 142.64 (d,  $J = 7.2$  Hz), 140.43, 134.67, 130.55 (d,  $J = 8.1$  Hz), 129.25, 127.13, 125.40, 123.09, 118.08, 115.92 (d,  $J = 20.5$  Hz), 113.40 (d,  $J = 21.1$  Hz), 40.26, 34.63, 23.27, 23.15, 23.02, 20.59. HRMS (ESI) calcd for  $\text{C}_{22}\text{H}_{22}\text{FN}_3\text{O}$  ( $\text{M}+\text{H}$ ) $^+$  364.1820, found 364.1821.

N-(4-fluorophenethyl)-2-phenyl-4,5,6,7-tetrahydro-2H-indazole-5-carboxamide (**6s**): white solid, yield 83%, m.p. 203–204 °C.  $^1\text{H}$  NMR (500 MHz,  $\text{DMSO-}d_6$ )  $\delta$  8.45 (t,  $J = 5.5$  Hz, 1H), 7.43–7.22 (m, 7H), 7.12 (t,  $J = 8.8$  Hz, 2H), 3.46 (dd,  $J = 12.8, 6.8$  Hz, 2H), 2.79 (t,  $J = 6.9$  Hz, 2H), 2.62 (t,  $J = 6.1$  Hz, 2H), 2.48 (t,  $J = 6.1$  Hz, 2H), 1.82–1.62 (m, 4H).  $^{13}\text{C}$  NMR (126 MHz,  $\text{DMSO-}d_6$ )  $\delta$  161.36 (d,  $J = 241.7$  Hz), 161.00, 149.42, 140.44, 135.75 (d,  $J = 2.7$  Hz), 134.70, 131.03, 130.97, 129.23, 127.13, 123.13, 118.07, 115.48, 115.31, 40.63, 34.17, 23.27, 23.15, 23.01, 20.59. HRMS (ESI) calcd for  $\text{C}_{22}\text{H}_{22}\text{FN}_3\text{O}$  ( $\text{M}+\text{H}$ ) $^+$  364.1820, found 364.1821.

N-(3-bromophenethyl)-2-phenyl-4,5,6,7-tetrahydro-2H-indazole-5-carboxamide (**6t**): white solid, yield 61%, m.p. 185–186 °C.  $^1\text{H}$  NMR (500 MHz,  $\text{DMSO-}d_6$ )  $\delta$  8.46 (t,  $J = 5.5$  Hz, 1H), 7.47–7.35 (m, 4H), 7.32–7.23 (m, 5H), 3.48 (q,  $J = 6.4$  Hz, 2H), 2.81 (t,  $J = 6.7$  Hz, 2H), 2.61 (t,  $J = 6.1$  Hz, 2H), 2.45 (t,  $J = 6.0$  Hz, 2H), 1.78–1.65 (m, 4H).  $^{13}\text{C}$  NMR (126 MHz,  $\text{DMSO-}d_6$ )  $\delta$  161.04, 149.41, 142.65, 140.42, 134.66, 132.12, 130.88, 129.52, 129.27, 128.41, 127.12, 123.07, 122.06, 118.08, 40.39, 34.46, 23.28, 23.16, 23.08, 20.64. HRMS (ESI) calcd for  $\text{C}_{22}\text{H}_{22}\text{BrN}_3\text{O}$  ( $\text{M}+\text{H}$ ) $^+$  424.1019, found 424.1020.

N-(4-bromophenethyl)-2-phenyl-4,5,6,7-tetrahydro-2H-indazole-5-carboxamide (**6u**): white solid; yield 77%, m.p. 209–210 °C.  $^1\text{H}$  NMR (500 MHz,  $\text{DMSO-}d_6$ )  $\delta$  8.43 (t,  $J = 5.6$  Hz, 1H), 7.51–7.36 (m, 4H), 7.32–7.17 (m, 5H), 3.47 (q,  $J = 6.8$  Hz, 2H), 2.78 (t,  $J = 6.9$  Hz, 2H), 2.61 (t,  $J = 6.2$  Hz, 2H), 2.45 (t,  $J = 6.1$  Hz, 2H), 1.78–1.63 (m, 4H).  $^{13}\text{C}$  NMR (126 MHz,  $\text{DMSO-}d_6$ )  $\delta$  160.99, 149.42, 140.43, 139.11, 134.67, 131.56, 129.24, 127.12, 123.12, 119.74, 118.09, 34.37, 23.28, 23.15, 23.02, 20.58. ESI-HRMS ( $m/z$ ) found: 424.1019 (calcd. for  $\text{C}_{22}\text{H}_{22}\text{BrN}_3\text{O}$  [ $\text{M}+\text{H}$ ] $^+$ : 424.1019). HRMS (ESI) calcd for  $\text{C}_{22}\text{H}_{22}\text{BrN}_3\text{O}$  ( $\text{M}+\text{H}$ ) $^+$  424.1019, found 424.1019.

N-(4-methylphenethyl)-2-phenyl-4,5,6,7-tetrahydro-2H-indazole-5-carboxamide (**6v**): white solid, yield 76%, m.p. 184–185 °C.  $^1\text{H}$  NMR (500 MHz,  $\text{DMSO-}d_6$ )  $\delta$  8.44 (t,  $J = 5.6$  Hz, 1H), 7.43–7.07 (m, 9H), 3.43 (dd,  $J = 13.0, 7.0$  Hz, 2H), 2.75 (t,  $J = 7.2$  Hz, 2H), 2.62 (t,  $J = 6.2$  Hz, 2H), 2.49–2.43 (m, 2H), 2.27 (s, 3H), 1.79–1.62 (m, 4H).  $^{13}\text{C}$  NMR (126 MHz,  $\text{DMSO-}d_6$ )  $\delta$  160.97, 149.41, 140.44, 136.47, 135.52, 134.74, 129.33, 129.25, 129.06, 127.12, 123.12, 118.08, 40.77, 34.70, 23.28, 23.16, 23.03, 21.12, 20.59. HRMS (ESI) calcd for  $\text{C}_{23}\text{H}_{25}\text{N}_3\text{O}$  ( $\text{M}+\text{H}$ ) $^+$  360.2070, found 360.2069.

N-(4-ethylphenethyl)-2-phenyl-4,5,6,7-tetrahydro-2H-indazole-5-carboxamide (**6w**): white solid, yield 73%, m.p. 130–131 °C.  $^1\text{H}$  NMR (500 MHz,  $\text{DMSO-}d_6$ )  $\delta$  8.45 (t,  $J = 5.6$  Hz, 1H), 7.41–7.36 (m, 2H), 7.33–7.28 (m, 3H), 7.16–7.09 (m, 4H), 3.44 (dd,  $J = 13.0, 7.0$  Hz, 2H), 2.76 (t,  $J = 7.2$  Hz, 2H), 2.64–2.54 (m, 4H), 2.45 (t,  $J = 6.2$  Hz, 2H), 1.78–1.63 (m, 4H), 1.16 (t,  $J = 7.6$  Hz, 3H).  $^{13}\text{C}$  NMR (126 MHz,  $\text{DMSO-}d_6$ )  $\delta$  160.99, 149.41, 141.95, 140.45, 136.73, 134.76, 129.26, 129.09, 128.14, 127.12, 123.13, 118.07, 40.72, 34.67, 28.28, 23.28, 23.16, 23.03, 20.56, 16.18. HRMS (ESI) calcd for  $\text{C}_{24}\text{H}_{27}\text{N}_3\text{O}$  ( $\text{M}+\text{H}$ ) $^+$  374.2227, found 374.2229.

N-(4-methoxyphenethyl)-2-phenyl-4,5,6,7-tetrahydro-2H-indazole-5-carboxamide (**6x**): white solid, yield 90%, m.p. 187–188 °C.  $^1\text{H}$  NMR (300 MHz,  $\text{DMSO-}d_6$ )  $\delta$  8.43 (t,  $J = 5.7$  Hz, 1H), 7.48–7.11 (m, 7H), 6.94–6.81 (m, 2H), 3.74 (s, 3H), 3.44 (dd,  $J = 12.8, 7.1$  Hz, 2H), 2.75 (t,  $J = 7.1$  Hz, 2H), 2.64 (t,  $J = 6.0$  Hz, 2H), 2.51–2.47 (m, 2H), 1.84–1.54 (m, 4H).  $^{13}\text{C}$  NMR (151 MHz,  $\text{DMSO-}d_6$ )  $\delta$  160.94, 158.19, 149.40, 140.43, 134.74, 131.43, 130.16, 129.24, 127.11, 123.11, 118.06, 114.17, 55.46, 40.90, 34.22, 23.28, 23.15, 23.02, 20.60. HRMS (ESI) calcd for  $\text{C}_{23}\text{H}_{25}\text{N}_3\text{O}_2$  ( $\text{M}+\text{Na}$ ) $^+$  398.1839, found 398.1840.

$^1\text{H}$  NMR and  $^{13}\text{C}$  NMR spectra of target compounds

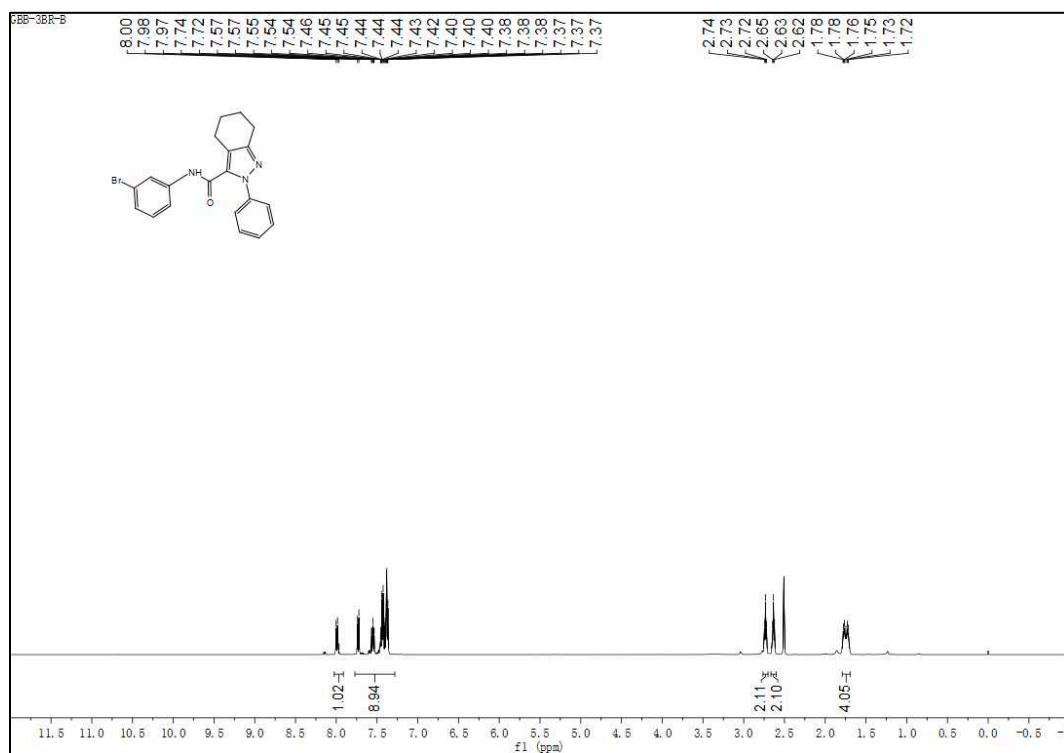

$^1\text{H}$  NMR spectra of compound **6a**

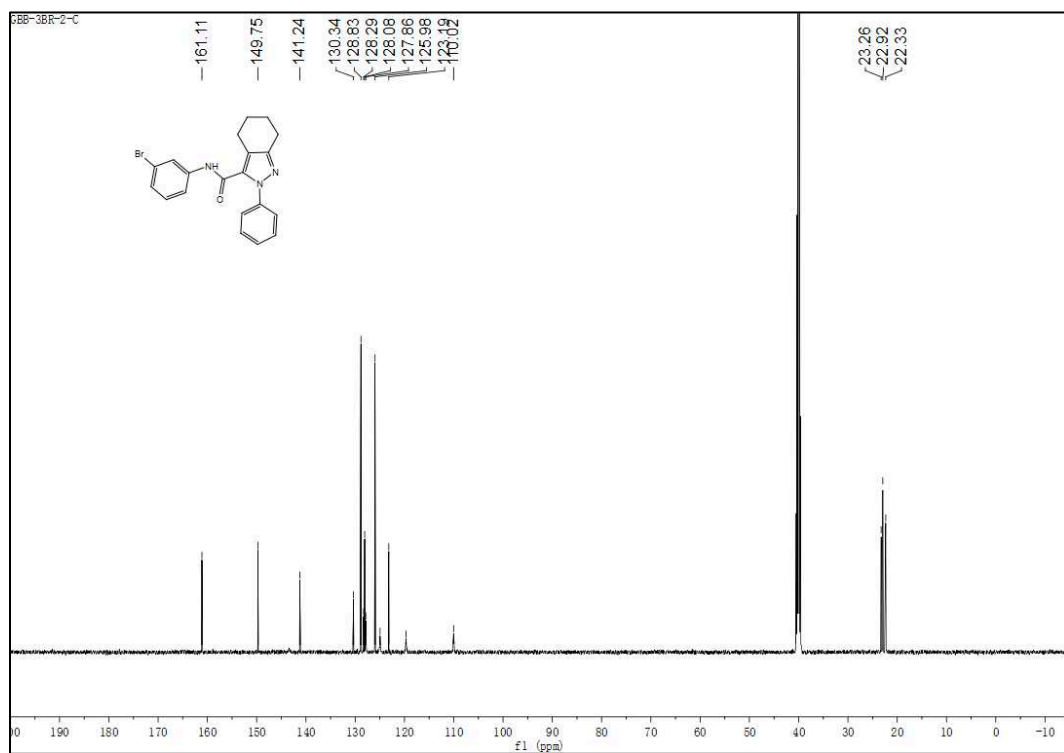

$^{13}\text{C}$  NMR spectra of compound **6a**



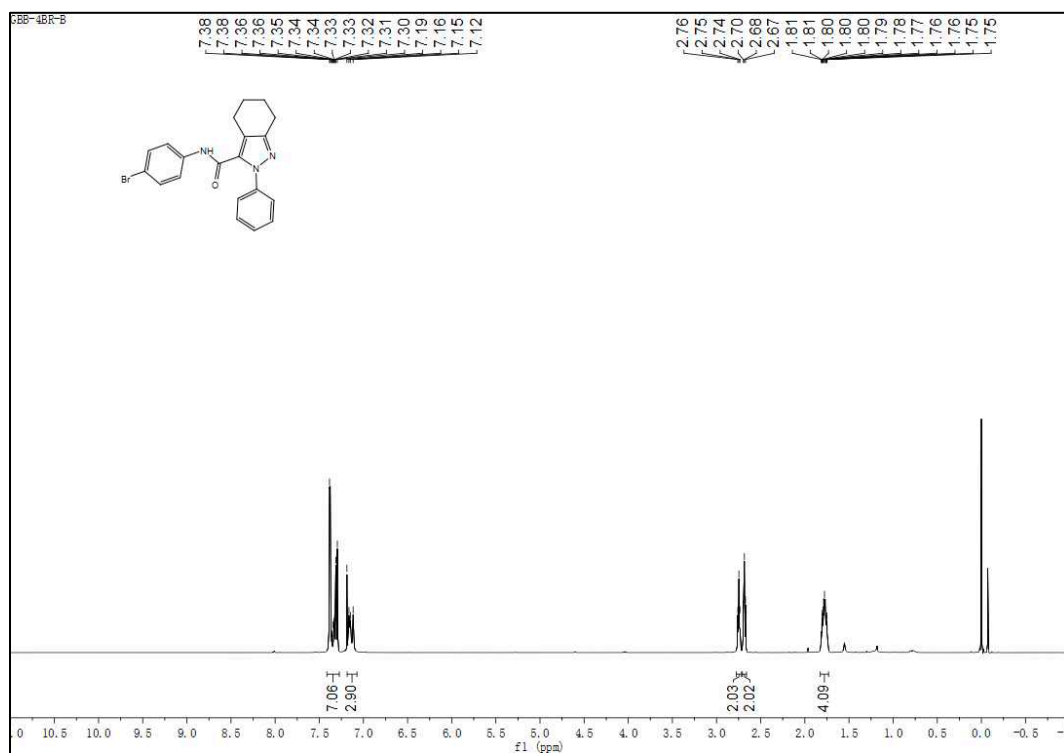

<sup>1</sup>H NMR spectra of compound **6b**

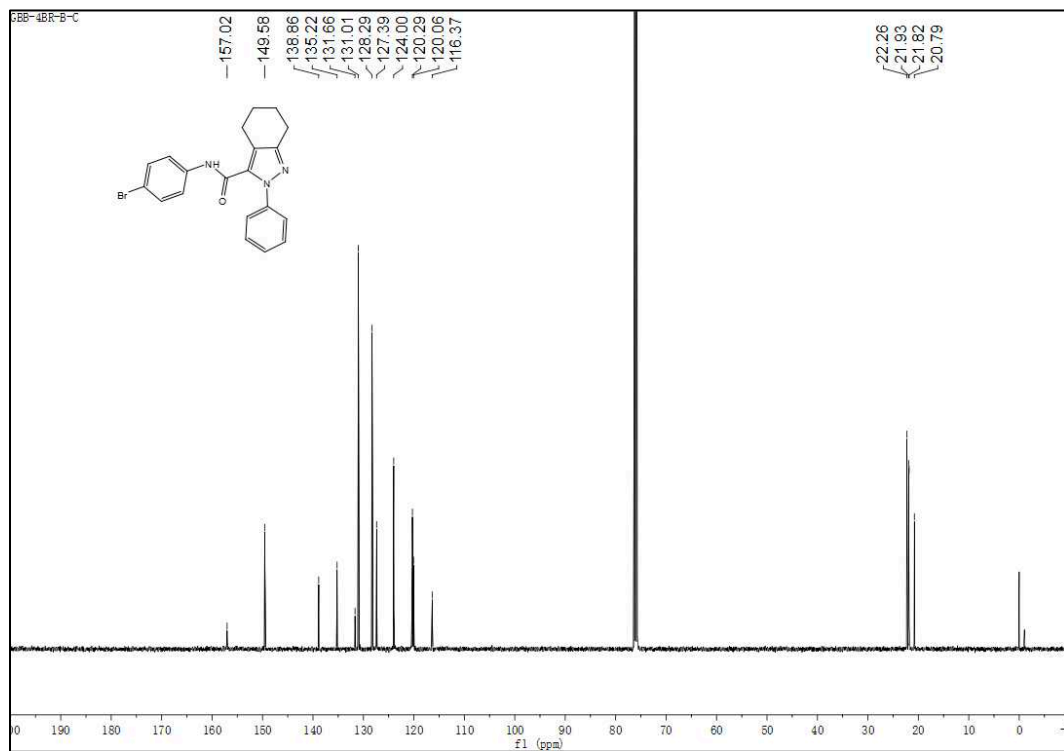

<sup>13</sup>C NMR spectra of compound **6b**

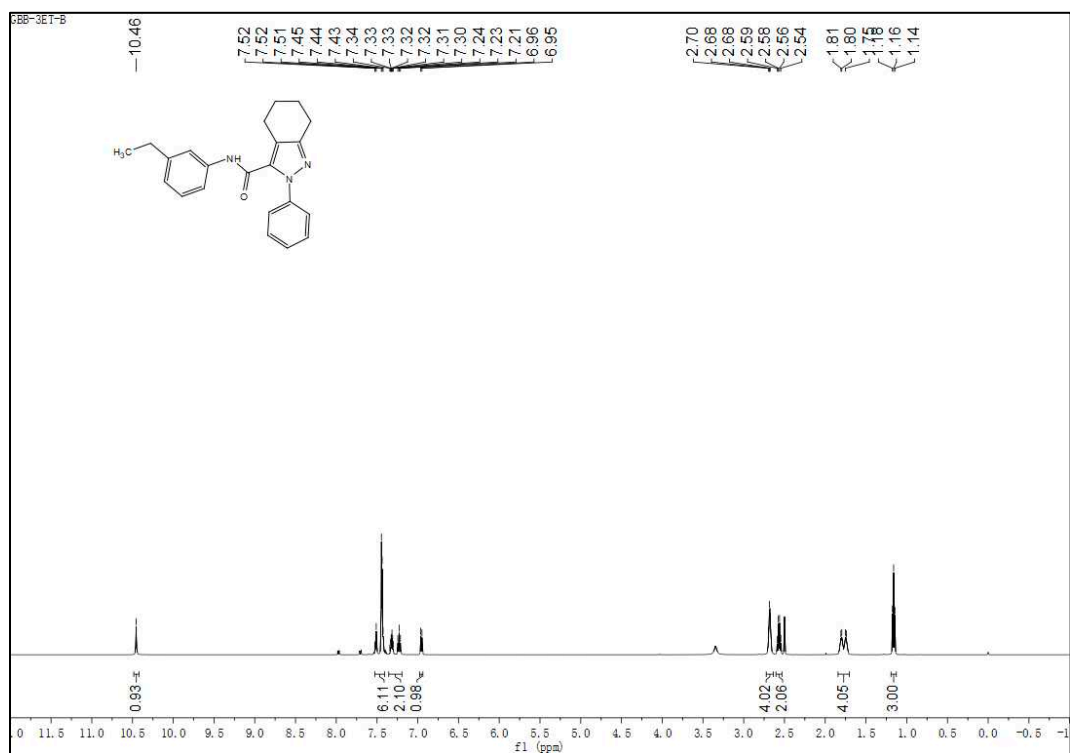

<sup>1</sup>H NMR spectra of compound **6c**

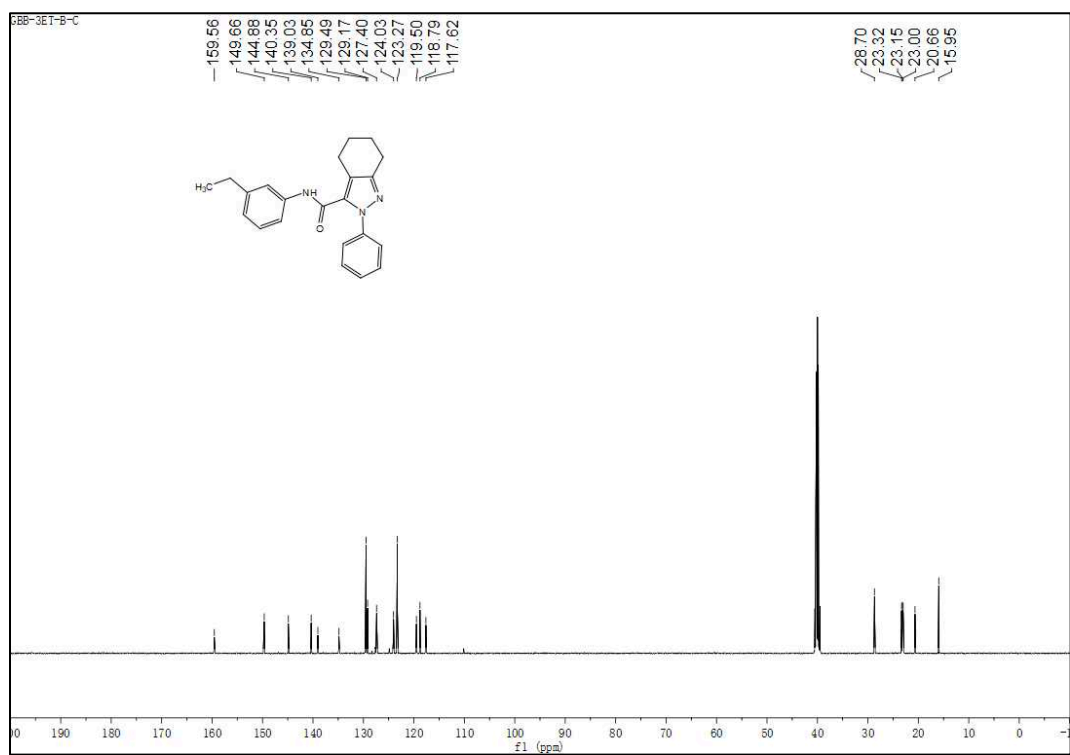

<sup>13</sup>C NMR spectra of compound **6c**

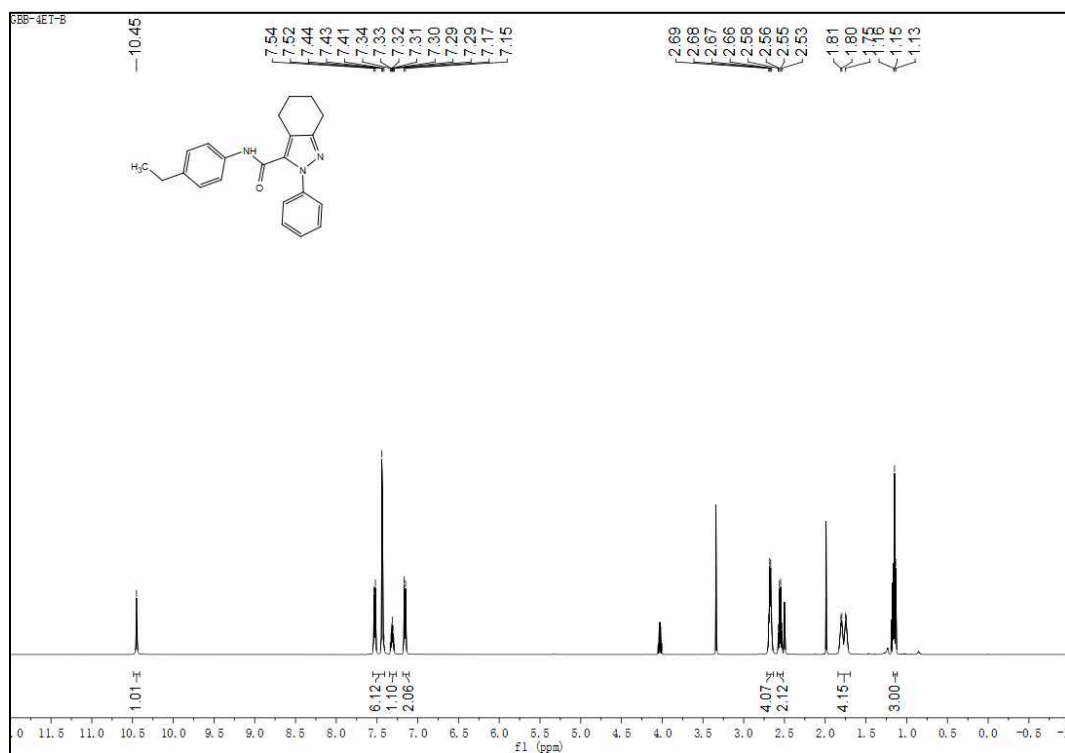

<sup>1</sup>H NMR spectra of compound **6d**

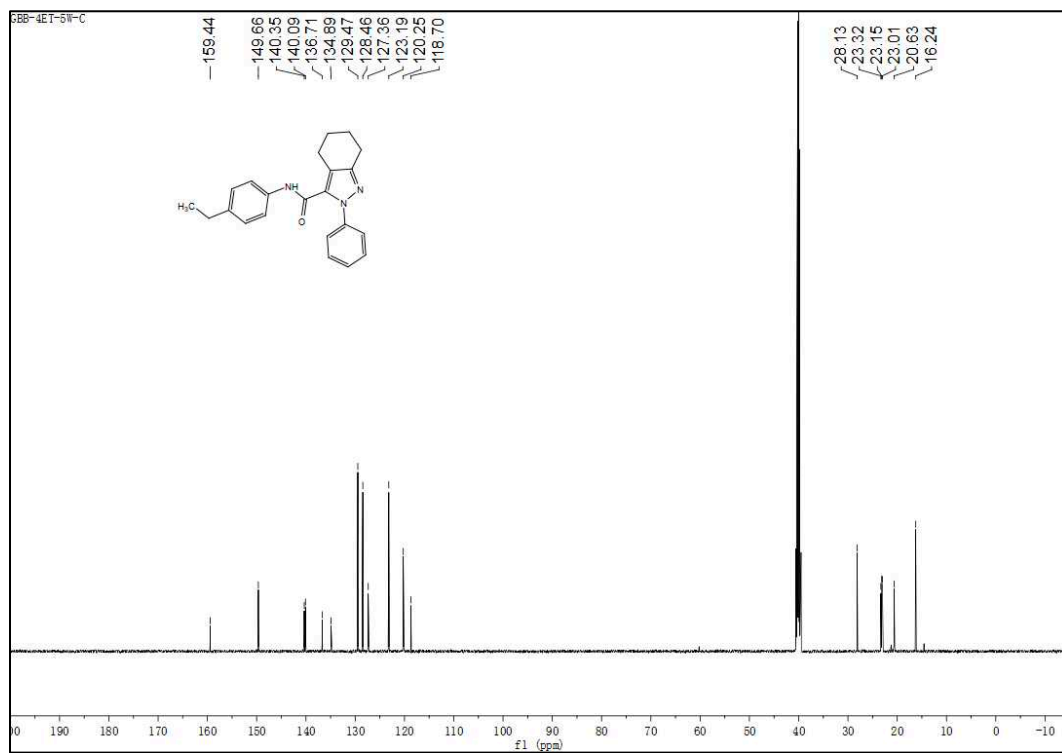

<sup>13</sup>C NMR spectra of compound **6d**

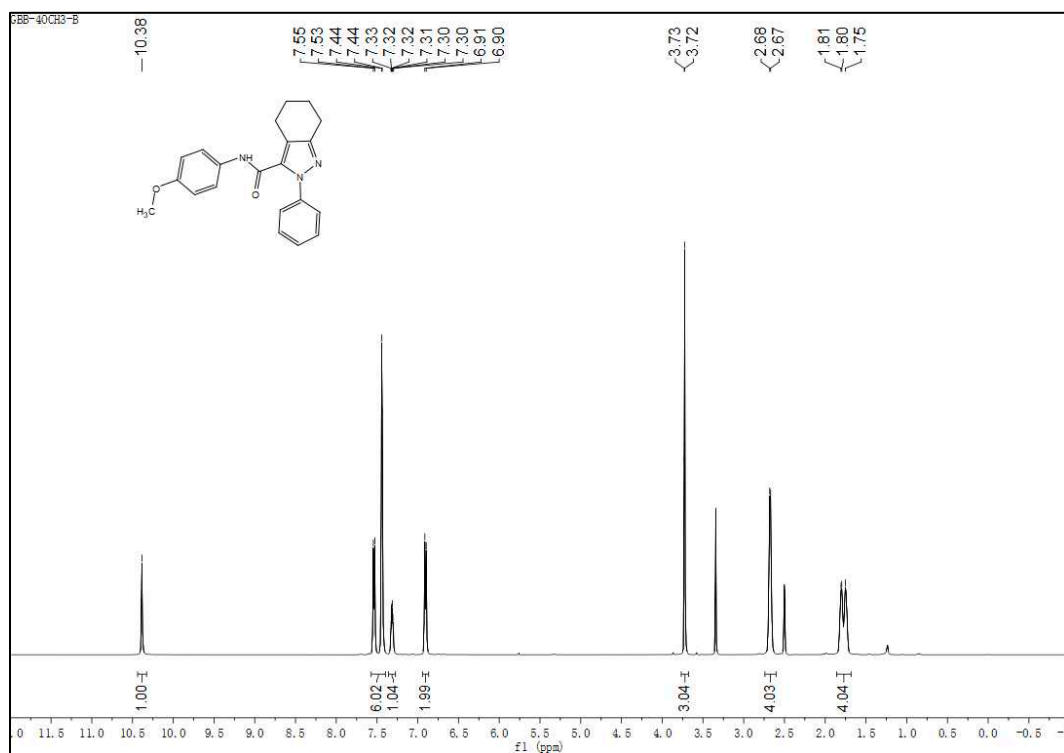

$^1\text{H}$  NMR spectra of compound **6e**

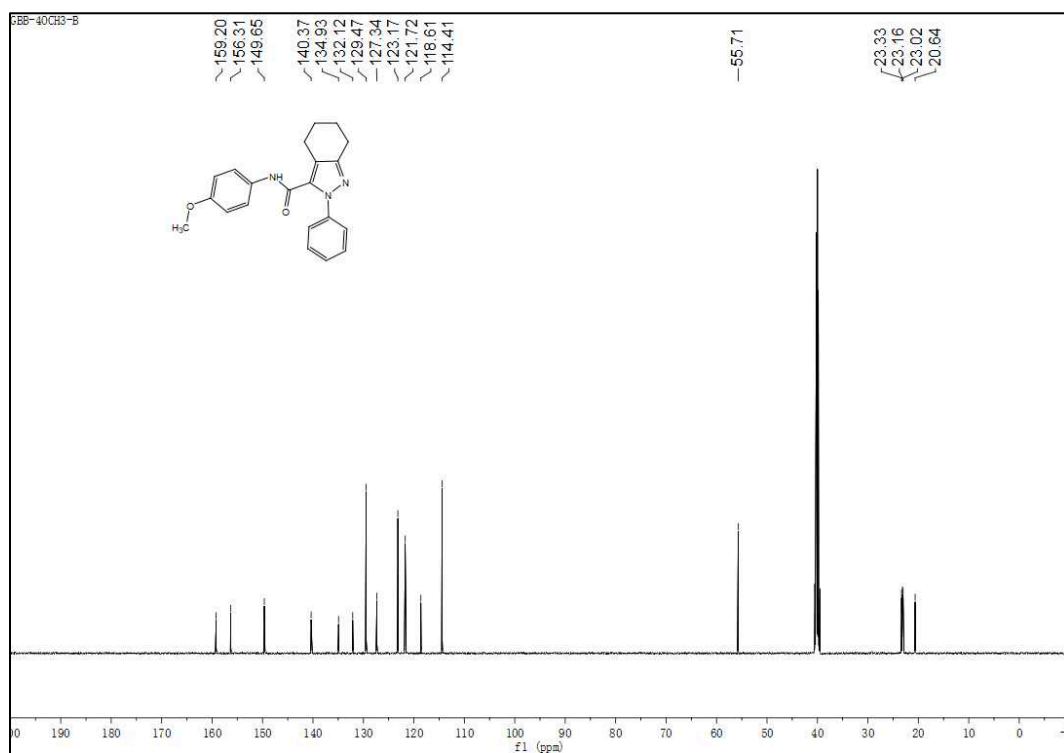

$^{13}\text{C}$  NMR spectra of compound **6e**

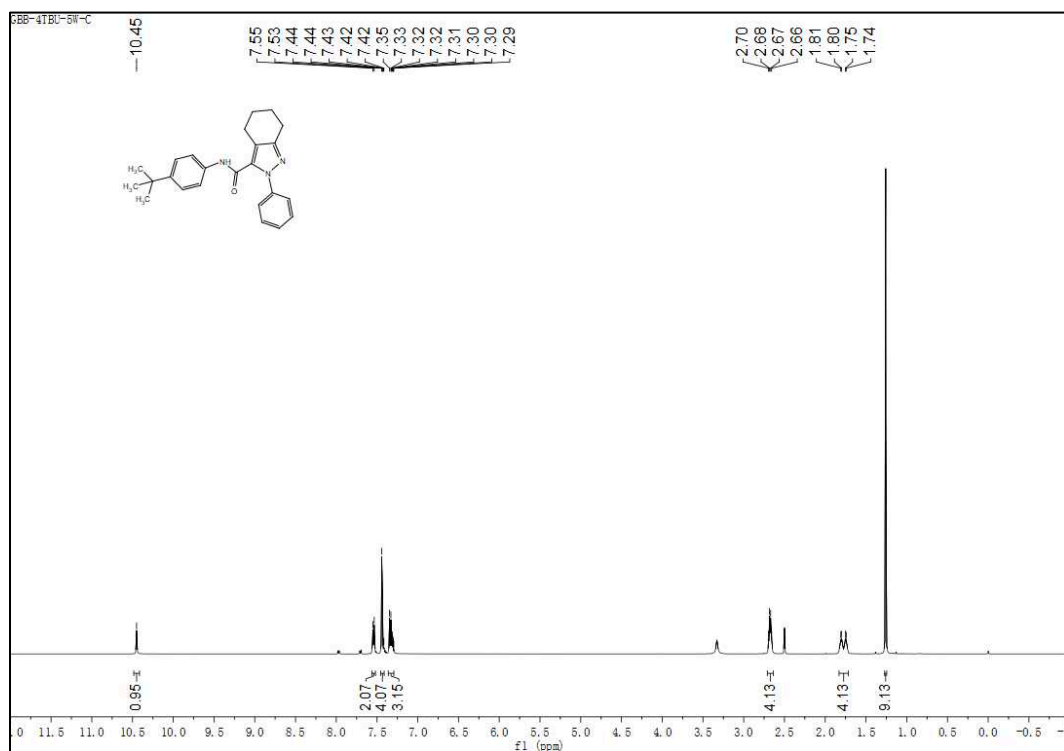

<sup>1</sup>H NMR spectra of compound 6f

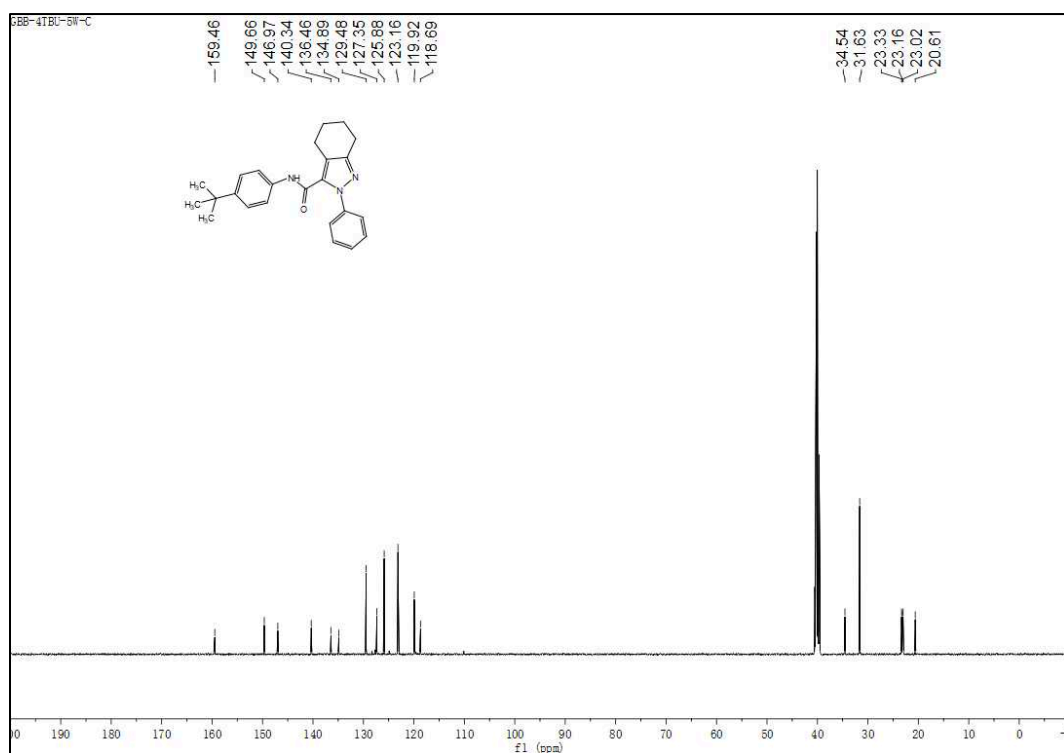

<sup>13</sup>C NMR spectra of compound 6f

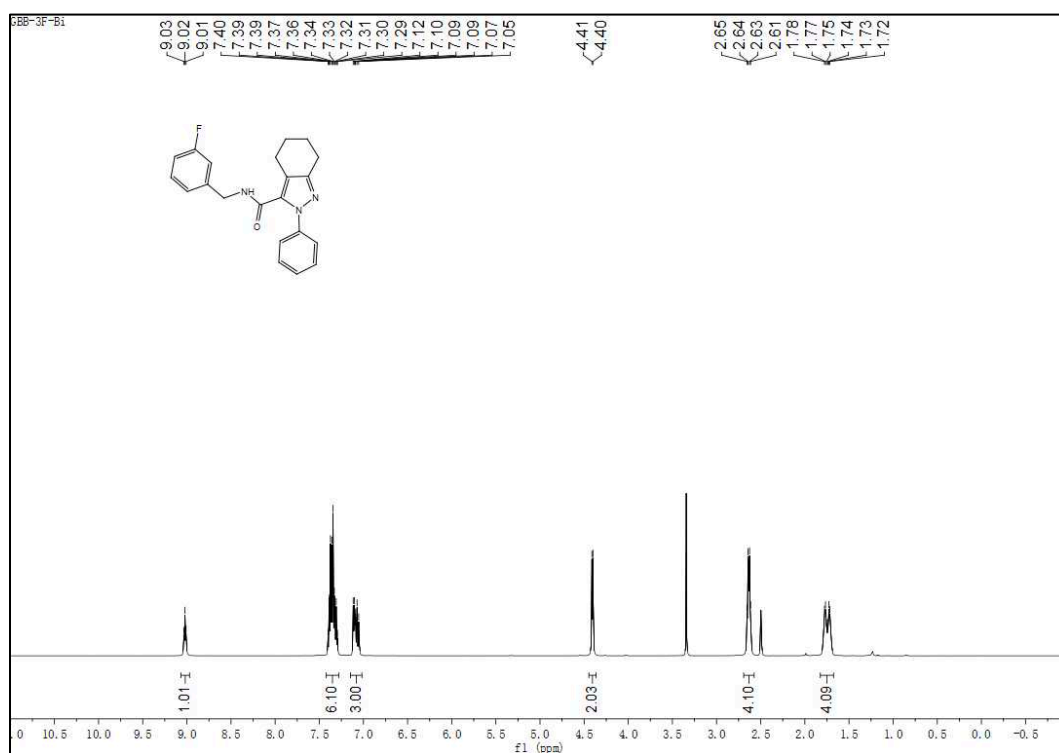

<sup>1</sup>H NMR spectra of compound **6g**

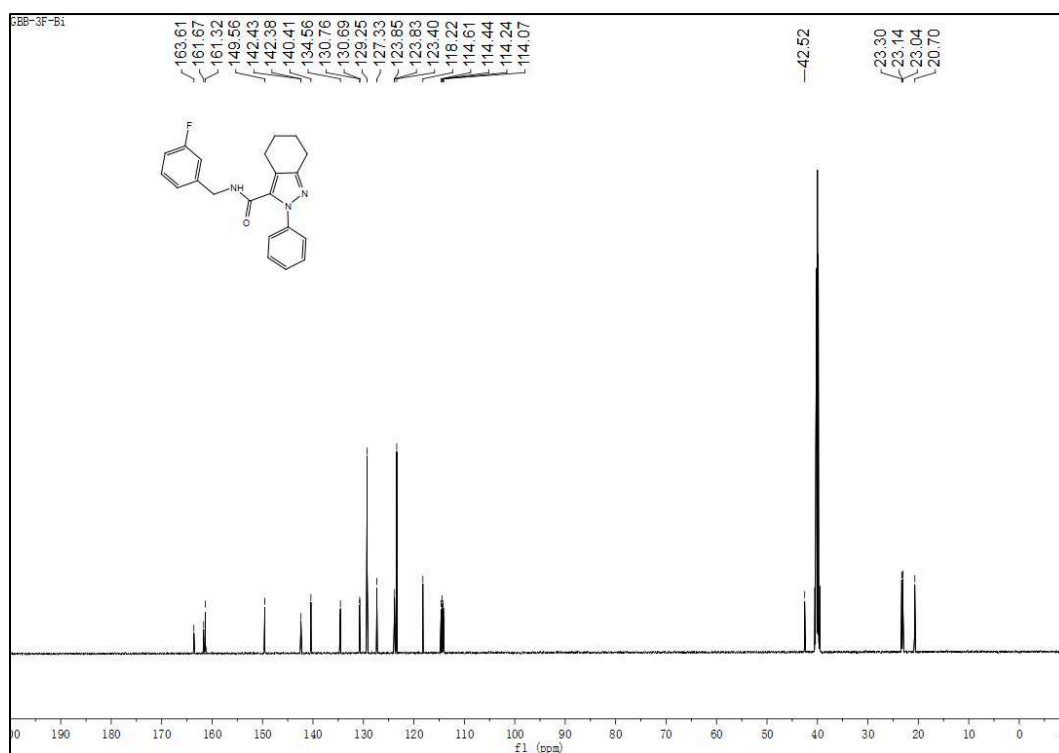

<sup>13</sup>C NMR spectra of compound **6g**

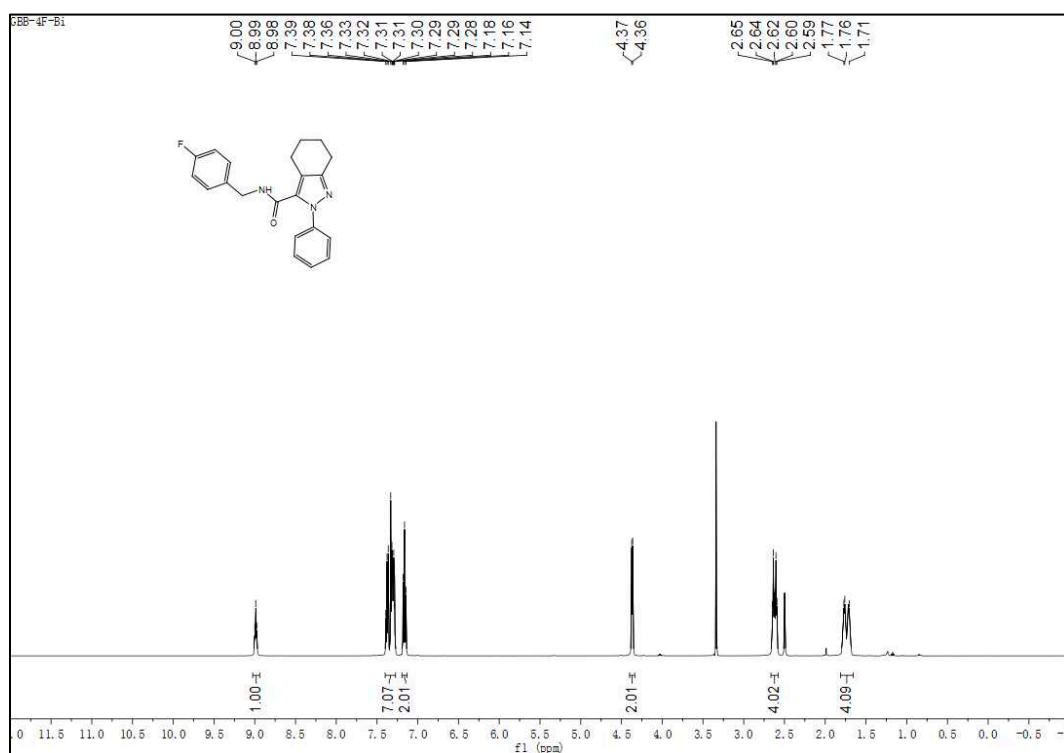

<sup>1</sup>H NMR spectra of compound 6h

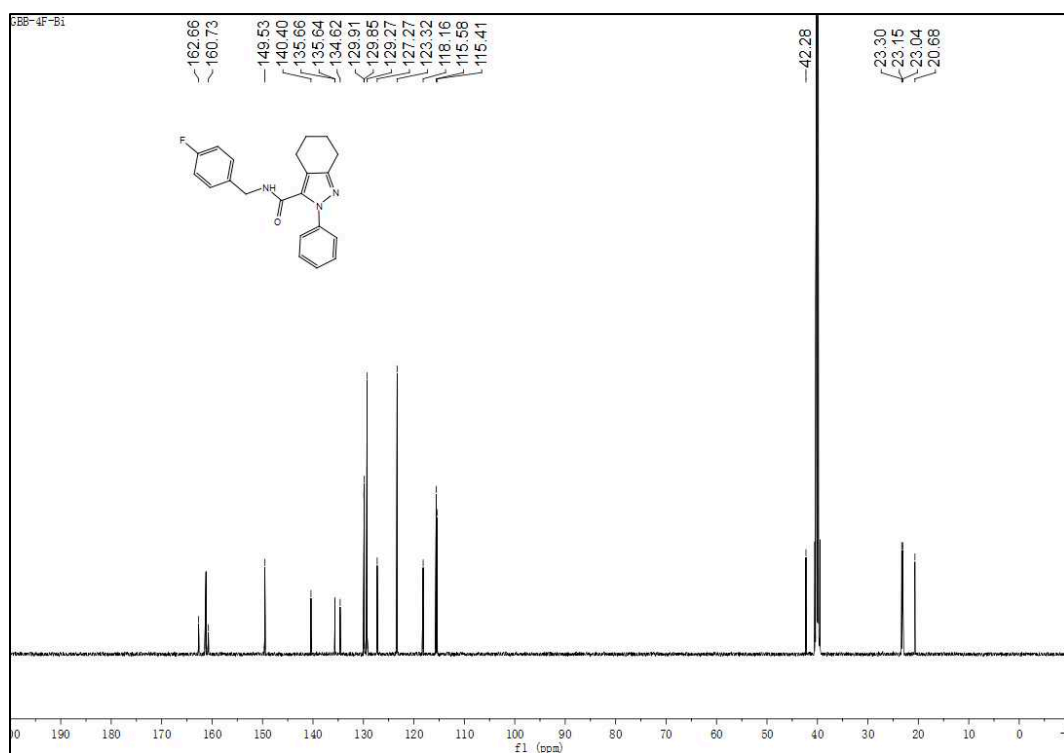

<sup>13</sup>C NMR spectra of compound 6h

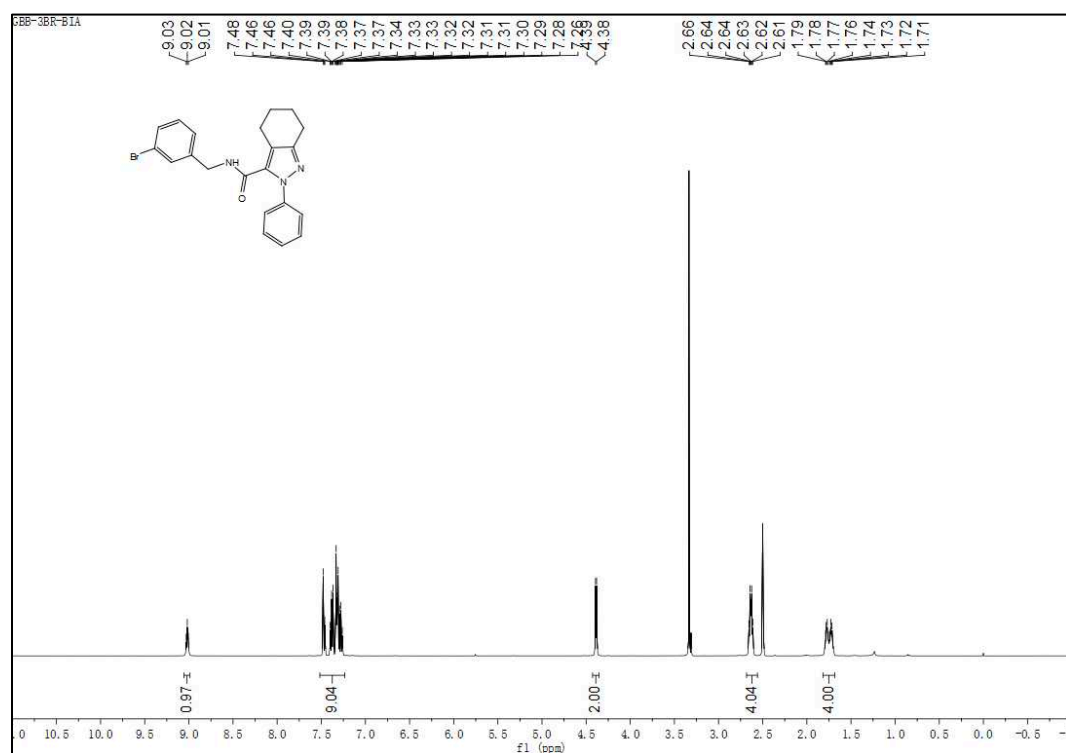

<sup>1</sup>H NMR spectra of compound **6i**

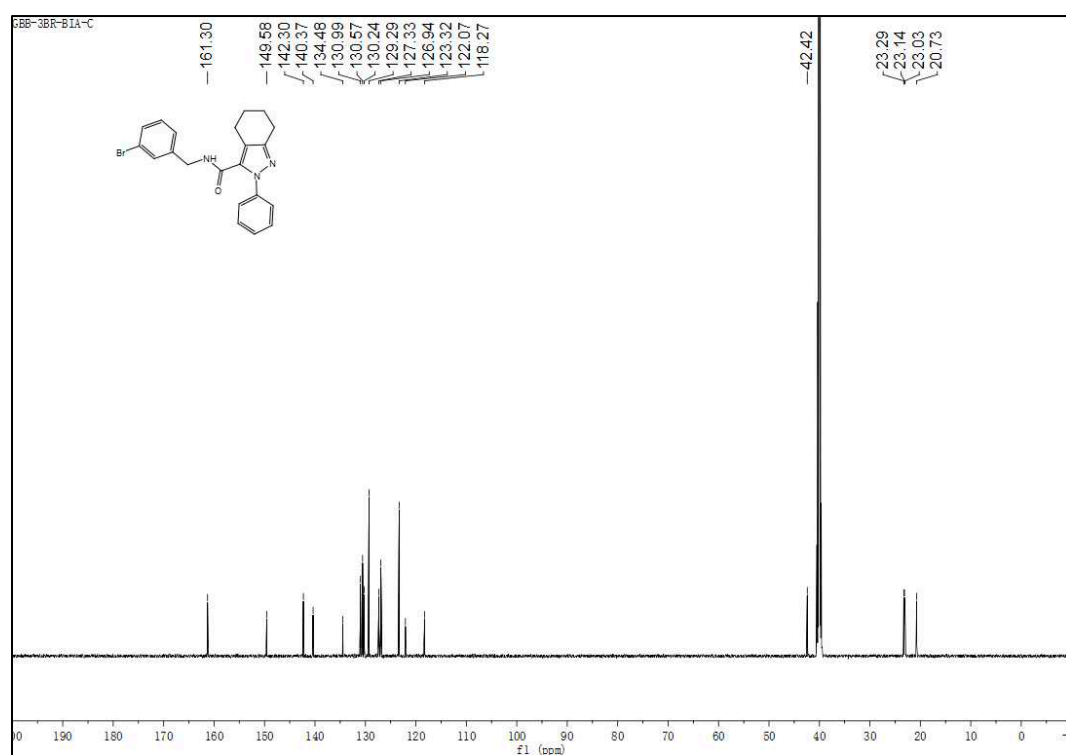

<sup>13</sup>C NMR spectra of compound **6i**



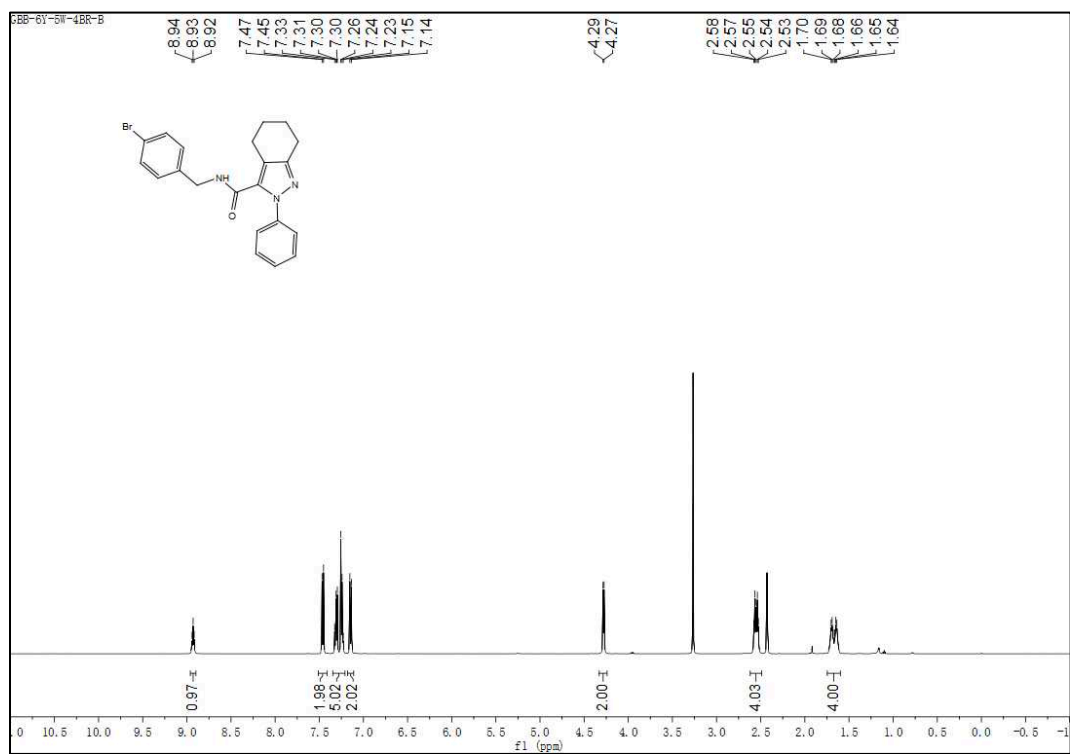

<sup>1</sup>H NMR spectra of compound 6j

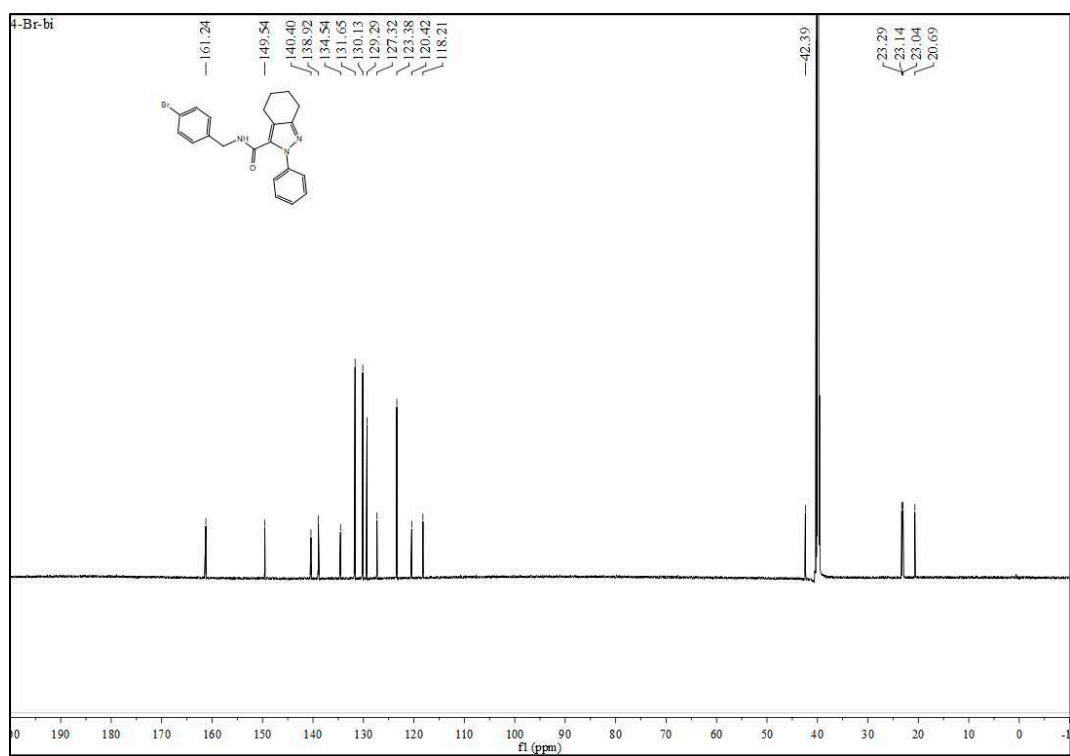

<sup>13</sup>C NMR spectra of compound 6j

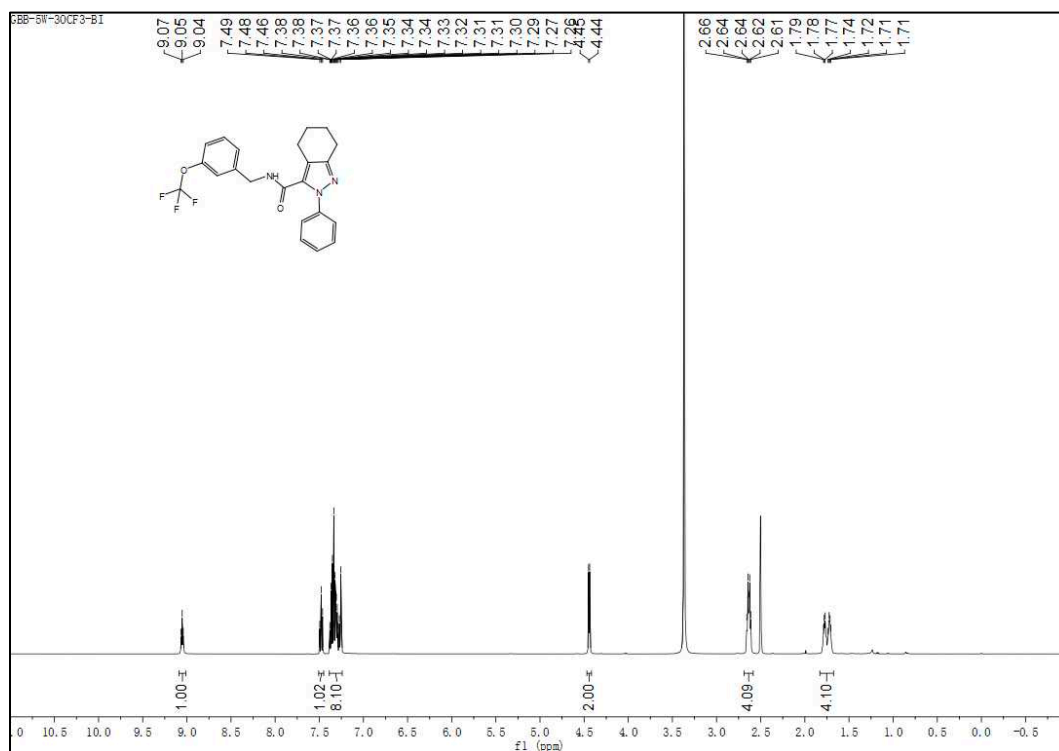

<sup>1</sup>H NMR spectra of compound 6k

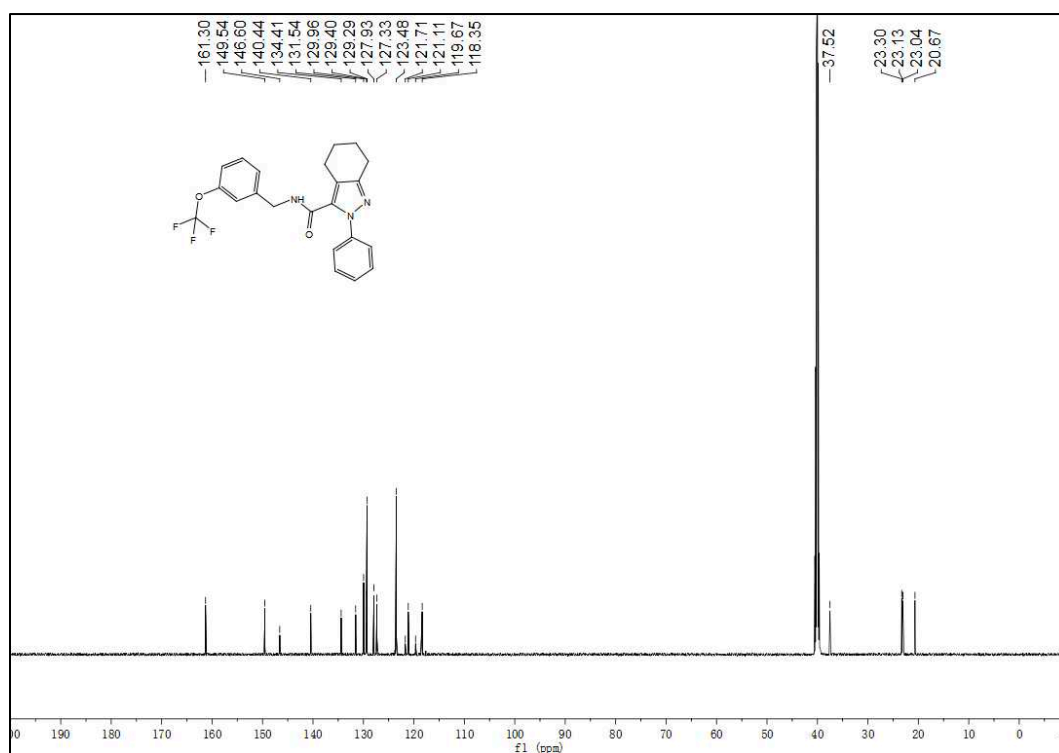

<sup>13</sup>C NMR spectra of compound 6k

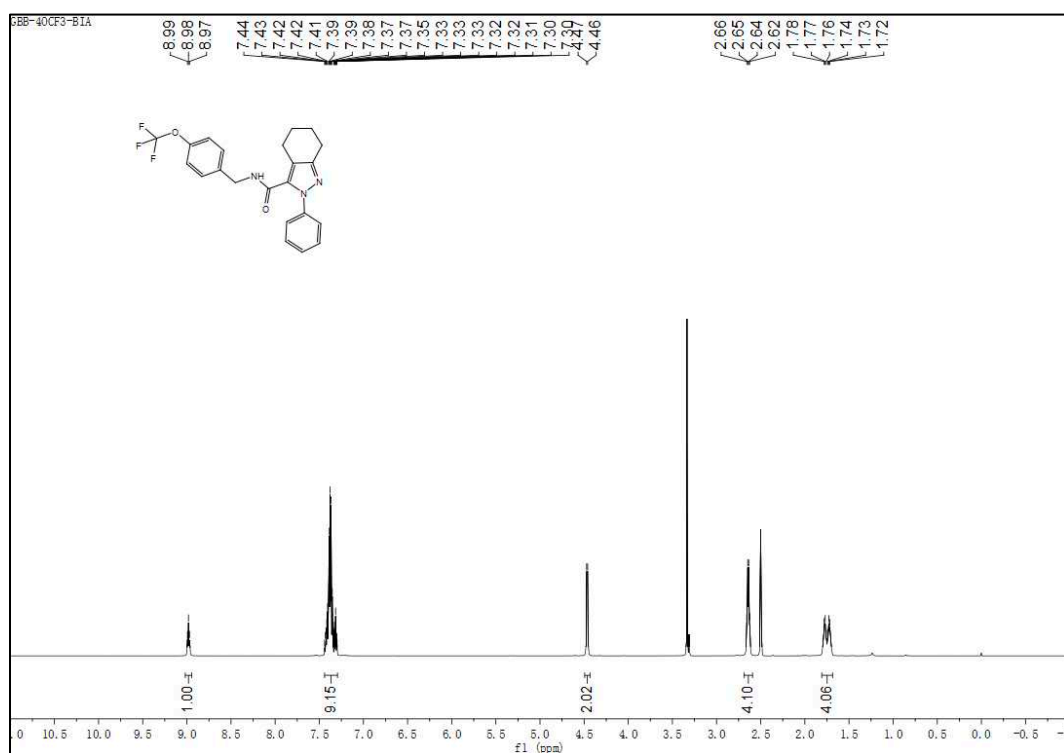

<sup>1</sup>H NMR spectra of compound **61**

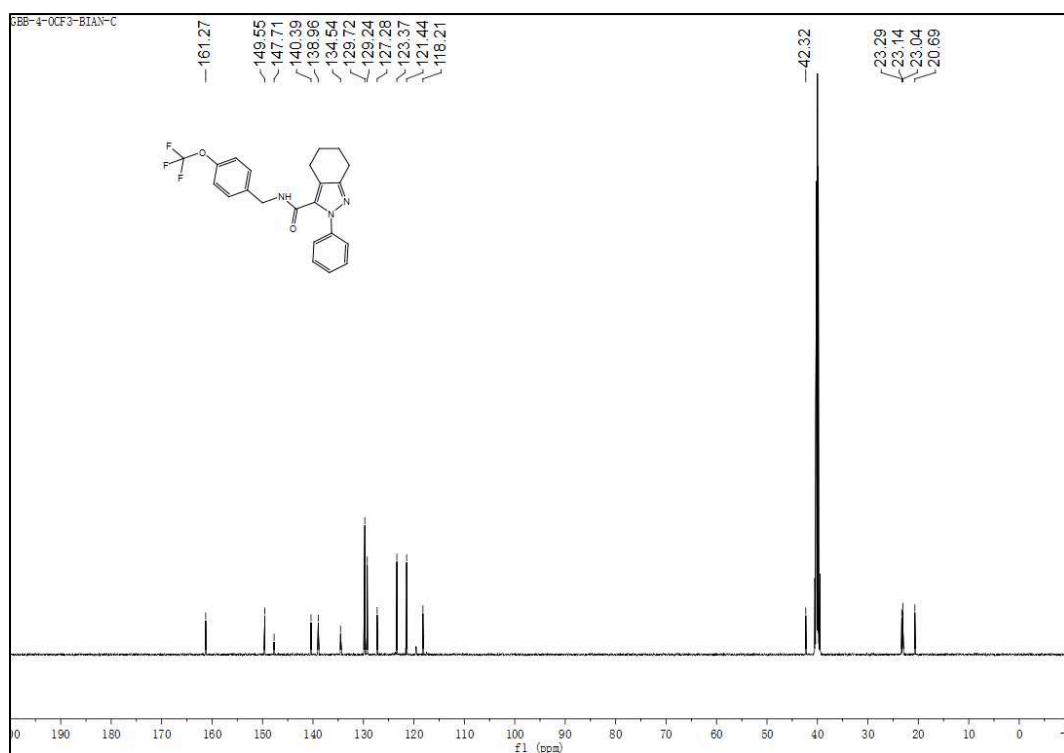

<sup>13</sup>C NMR spectra of compound **61**

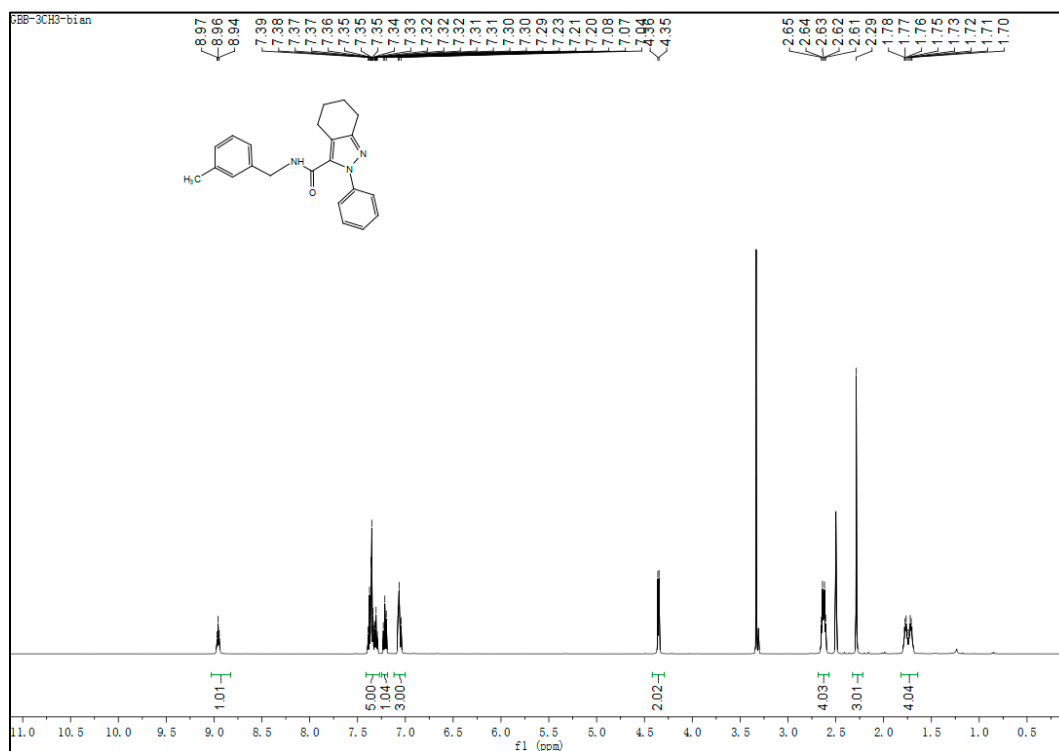

<sup>1</sup>H NMR spectra of compound 6m

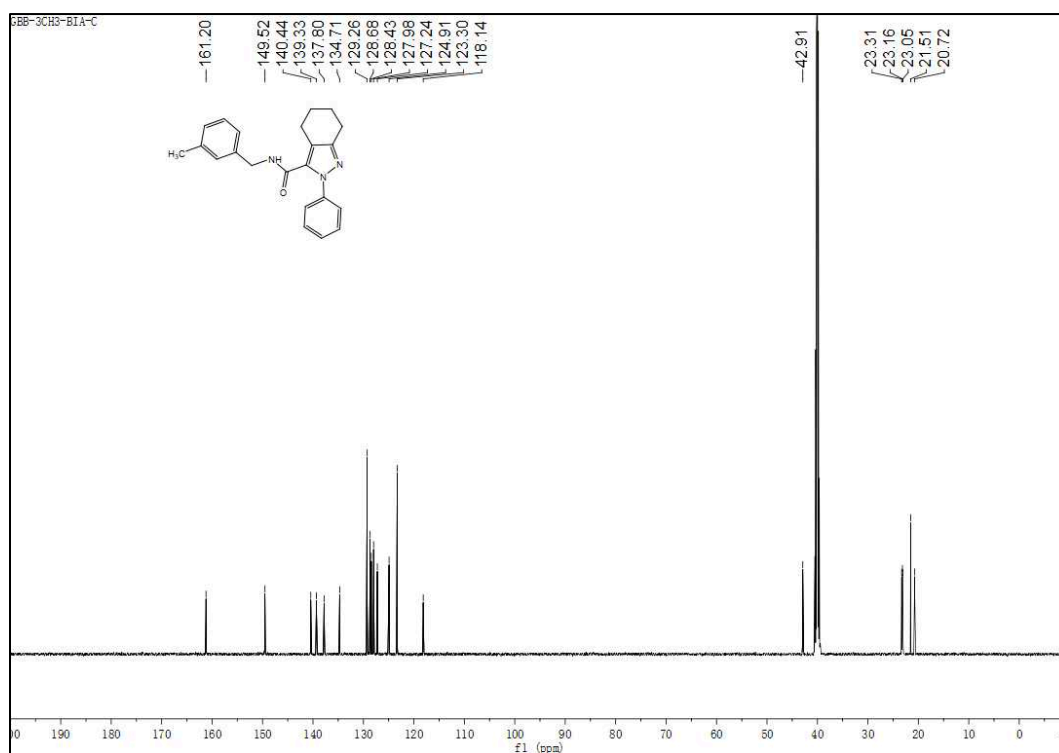

<sup>13</sup>C NMR spectra of compound 6m

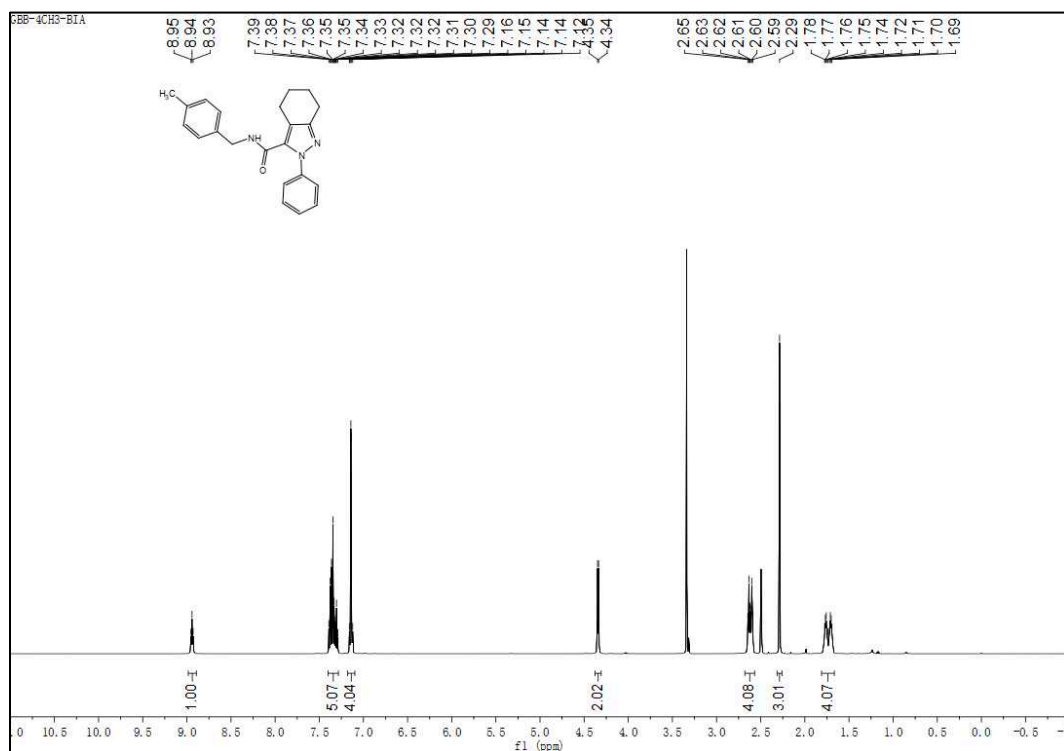

$^1\text{H}$  NMR spectra of compound **6n**

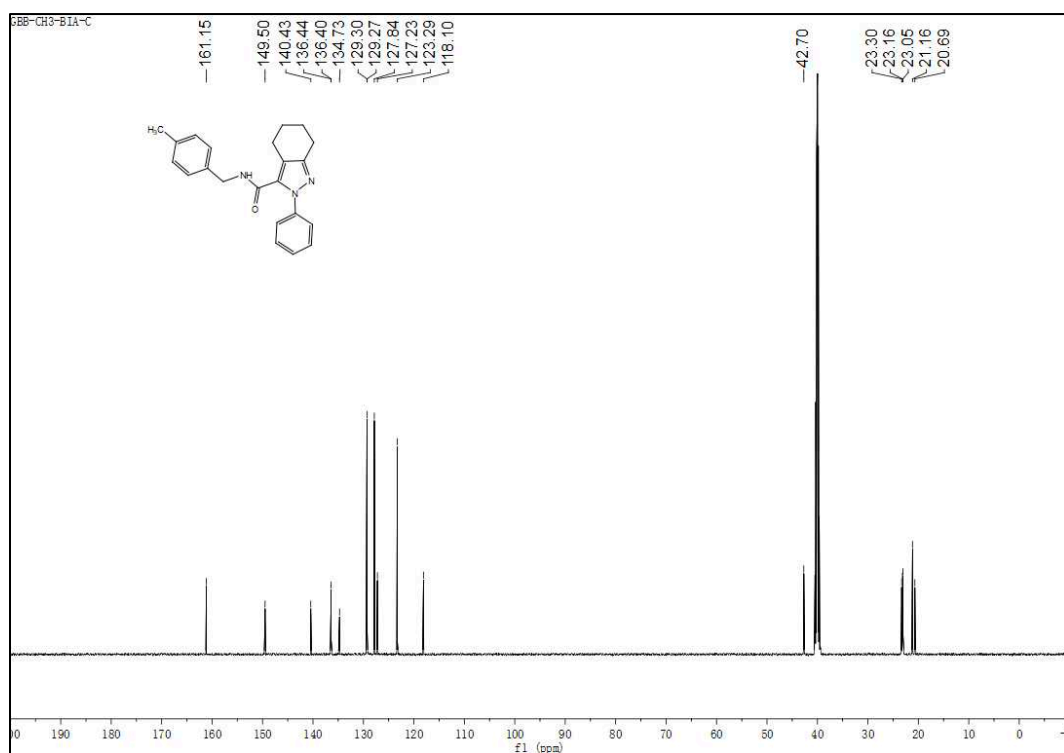

$^{13}\text{C}$  NMR spectra of compound **6n**

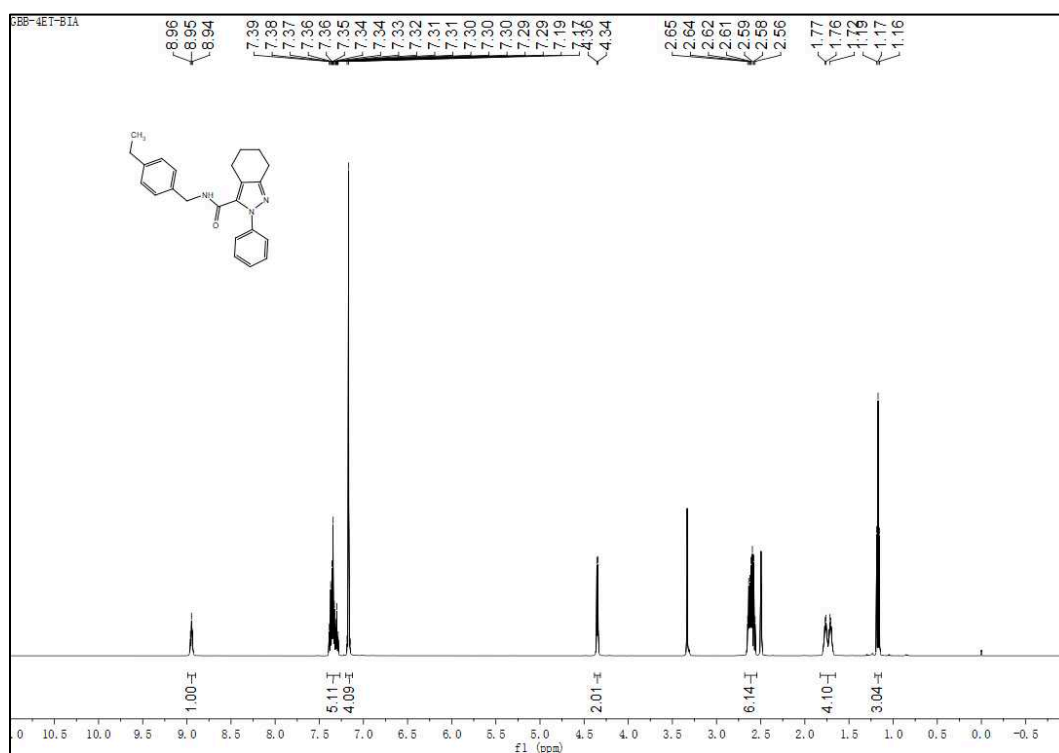

$^1\text{H}$  NMR spectra of compound **60**

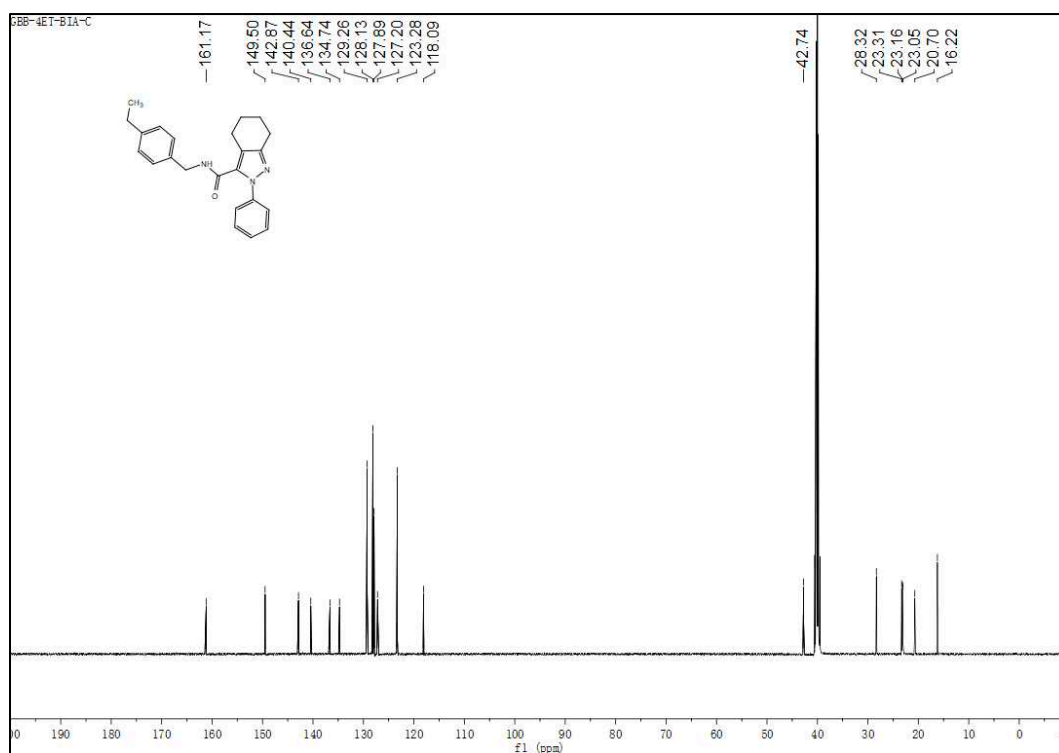

$^{13}\text{C}$  NMR spectra of compound **60**

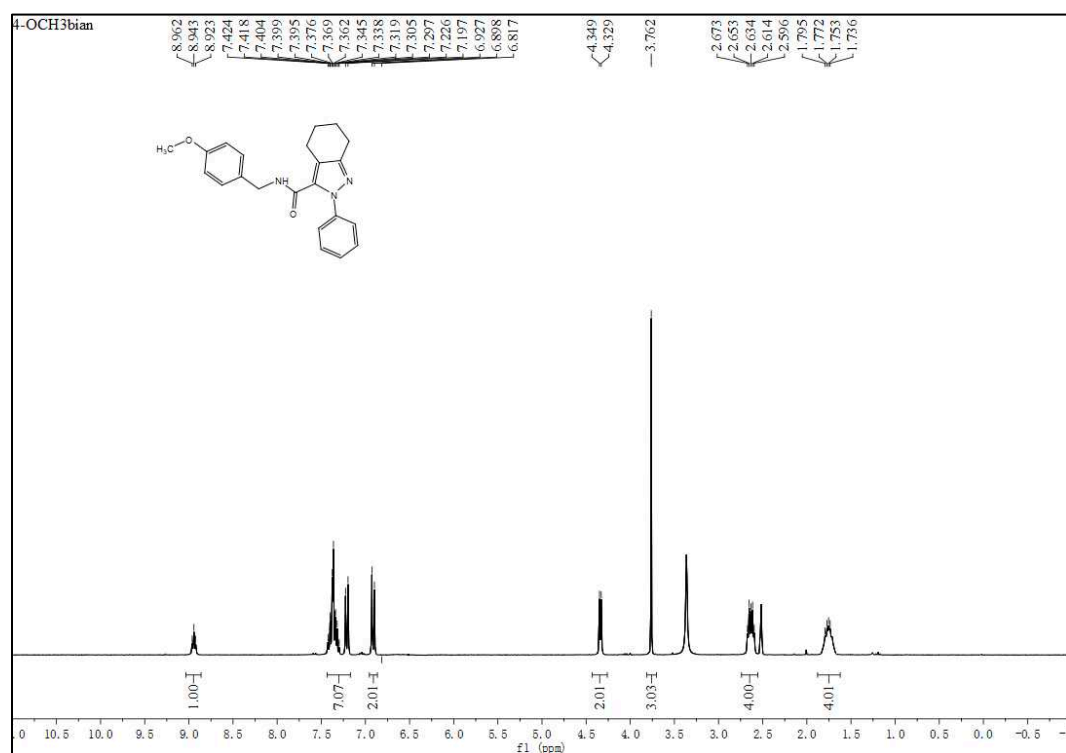

<sup>1</sup>H NMR spectra of compound **6p**

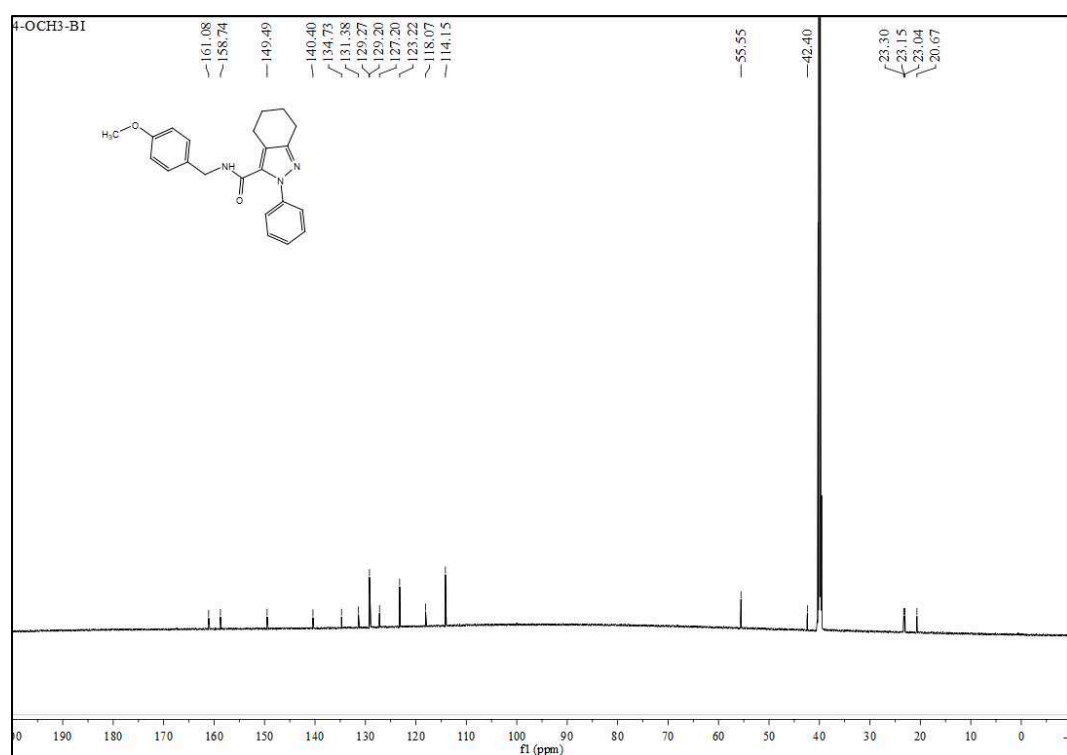

<sup>13</sup>C NMR spectra of compound **6p**

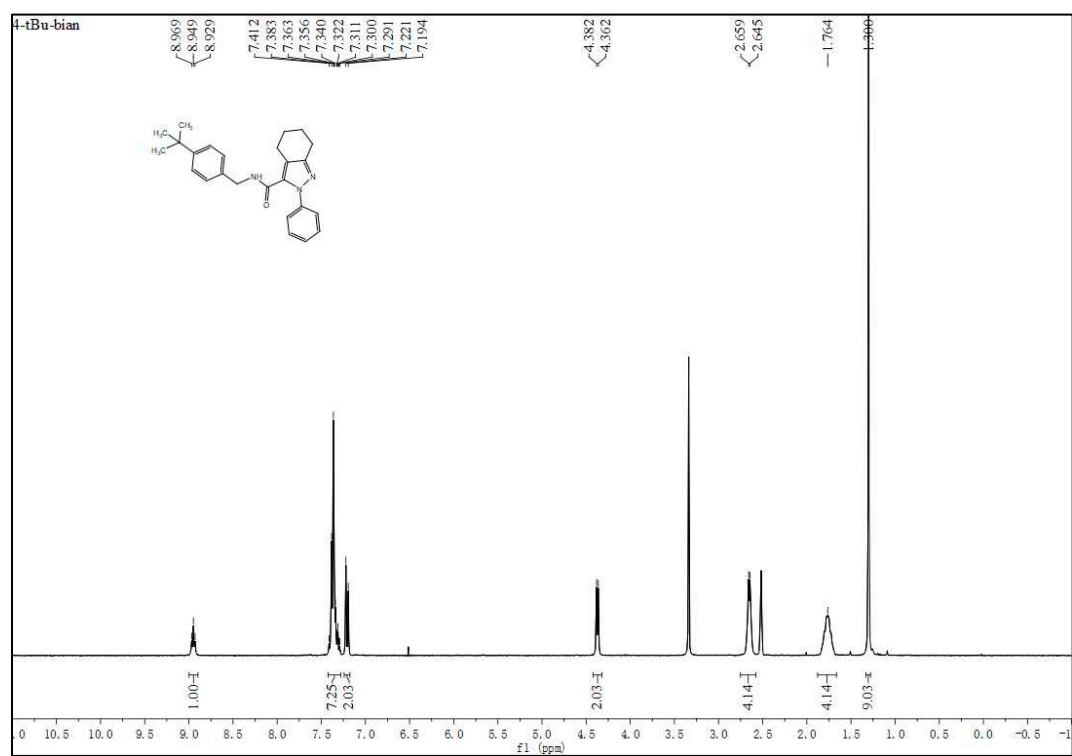

<sup>1</sup>H NMR spectra of compound 6q

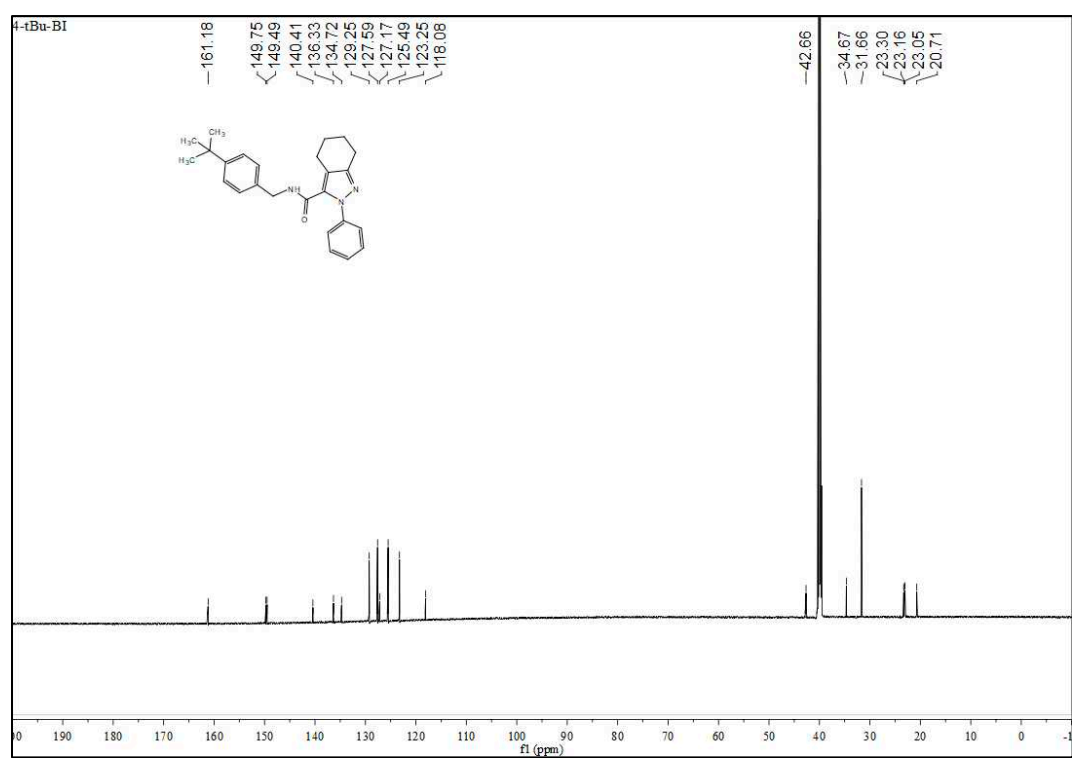

<sup>13</sup>C NMR spectra of compound 6q



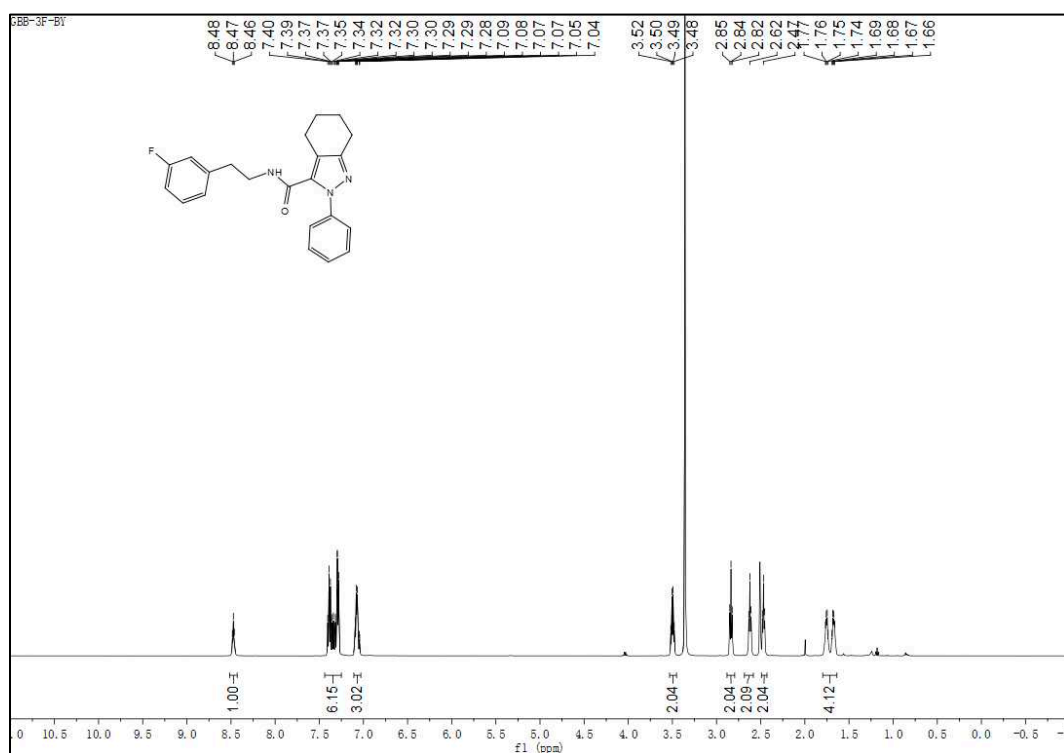

<sup>1</sup>H NMR spectra of compound **6r**

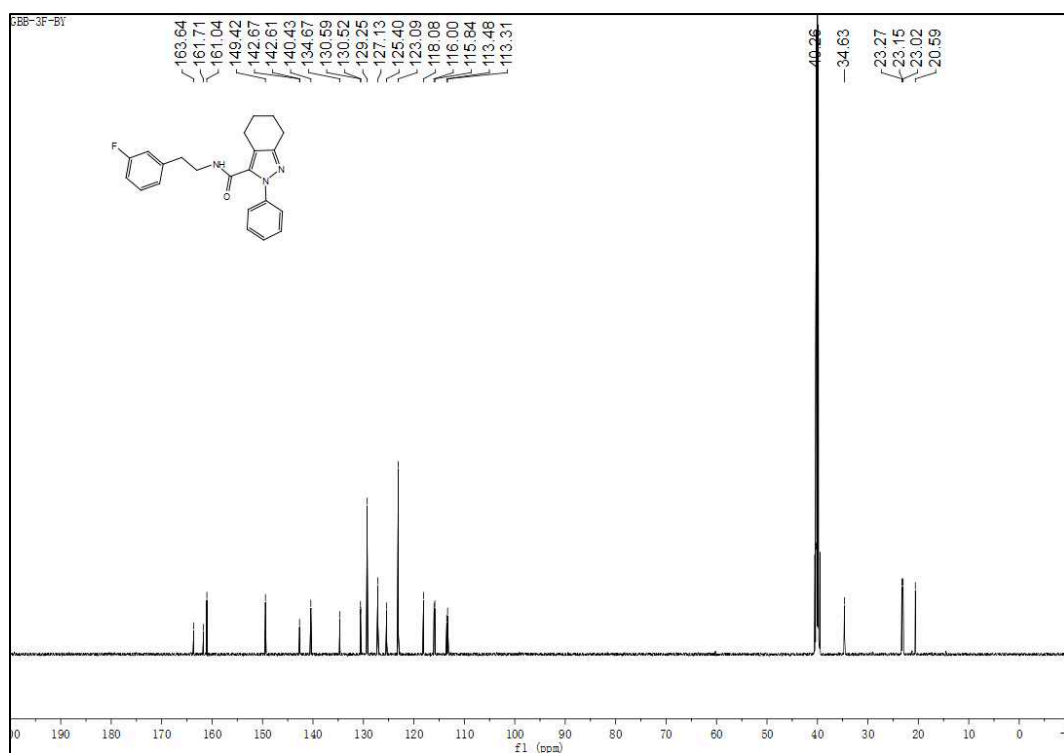

<sup>13</sup>C NMR spectra of compound **6r**

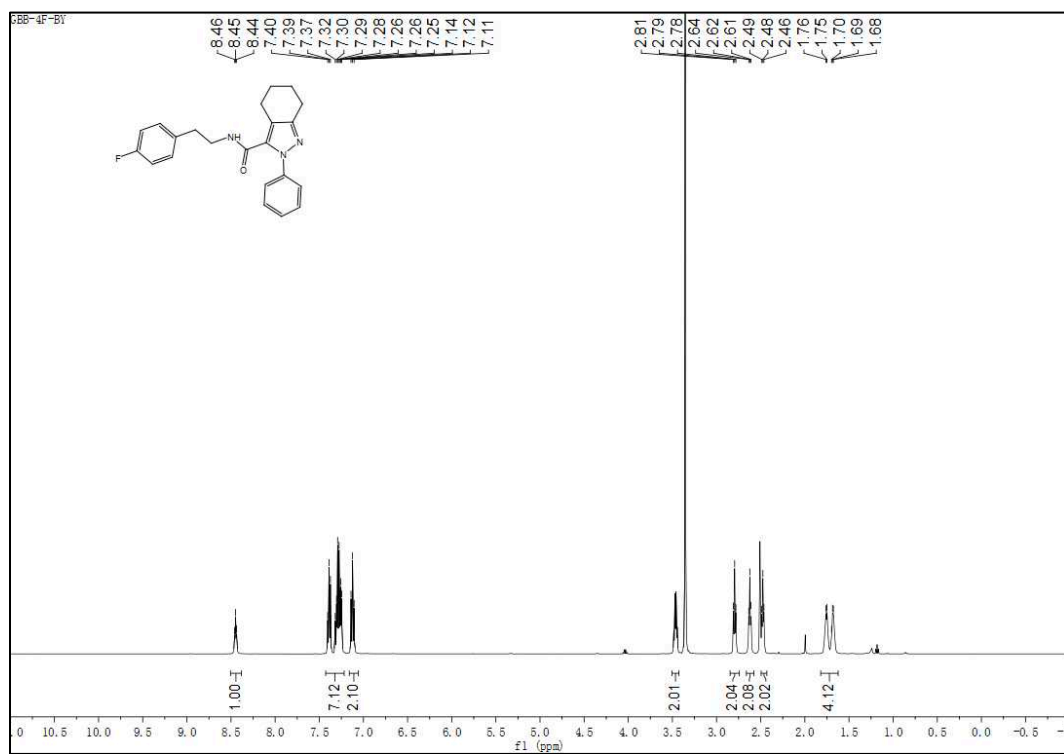

<sup>1</sup>H NMR spectra of compound 6s

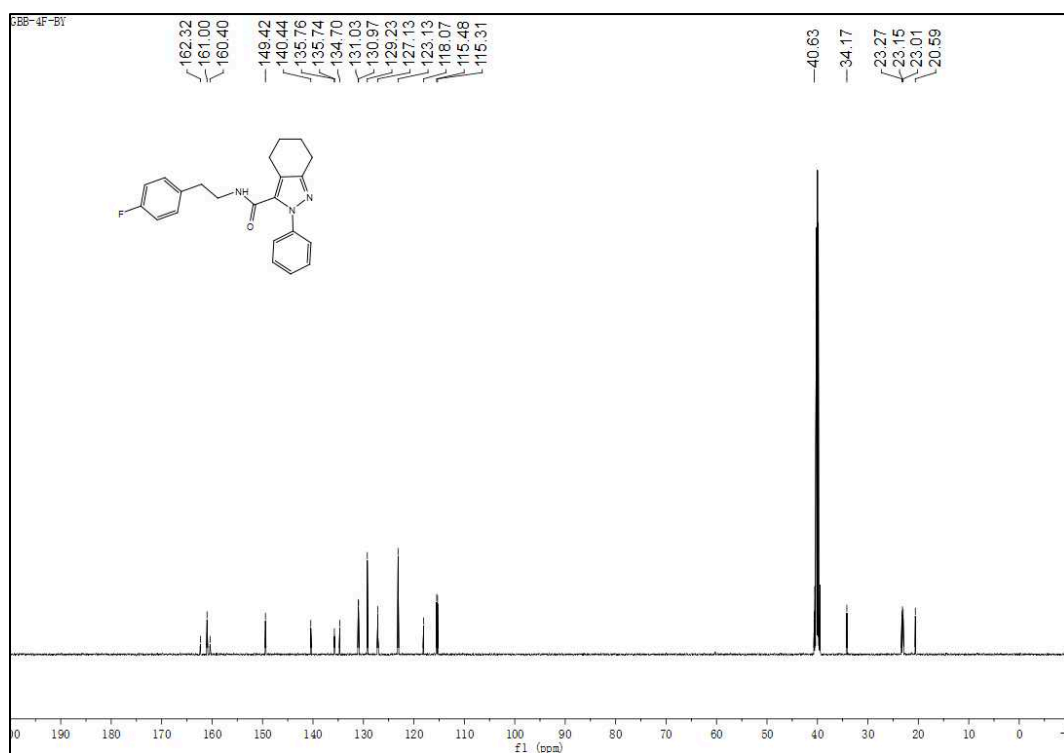

<sup>13</sup>C NMR spectra of compound 6s

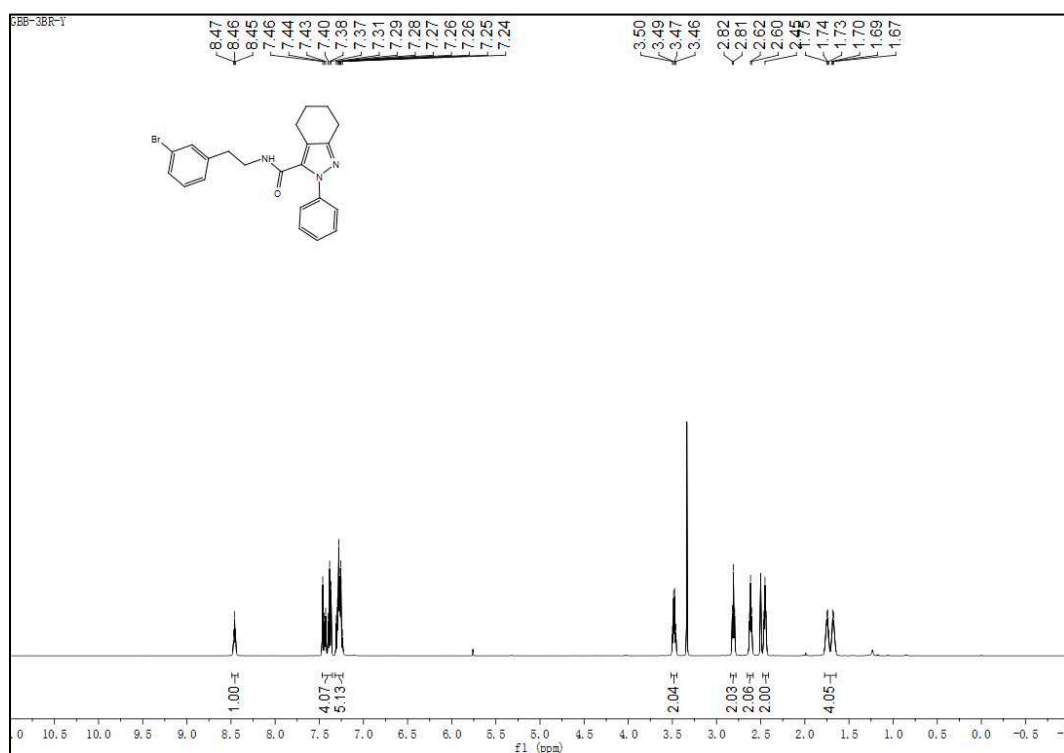

<sup>1</sup>H NMR spectra of compound **6t**

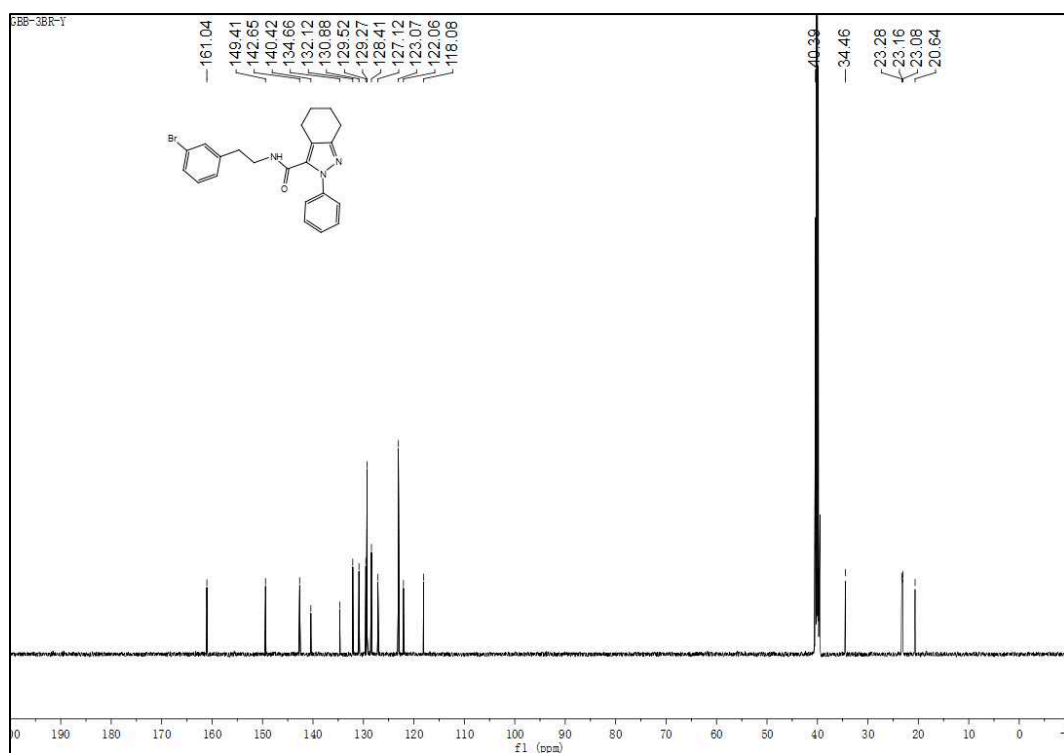

<sup>13</sup>C NMR spectra of compound **6t**

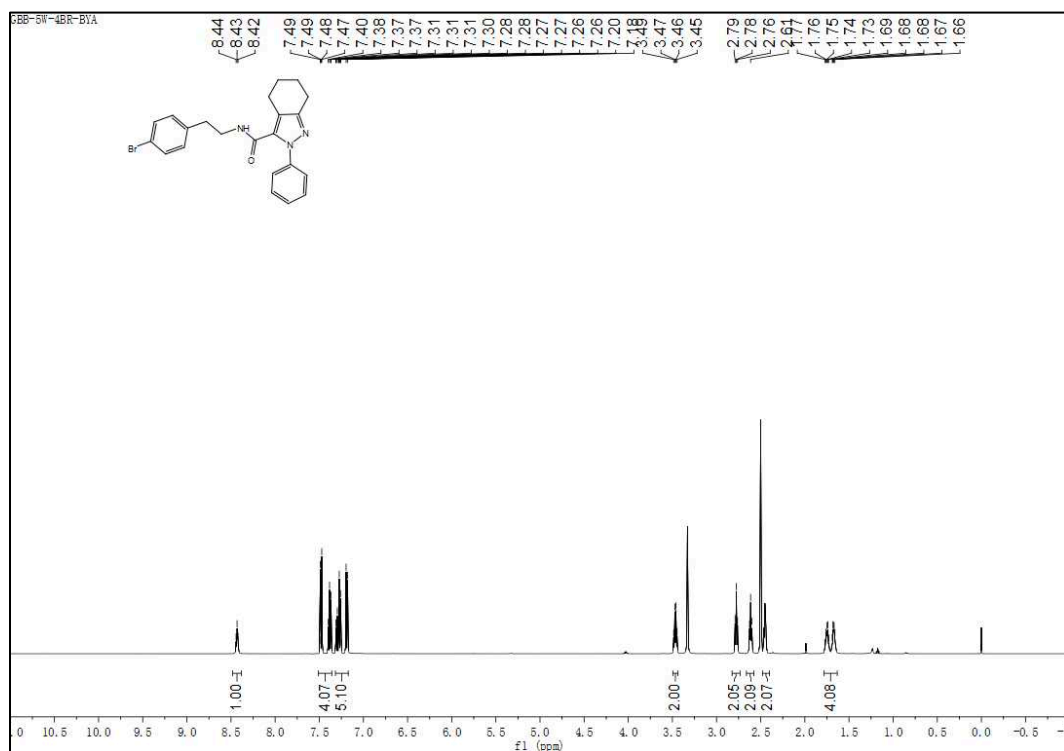

<sup>1</sup>H NMR spectra of compound **6u**

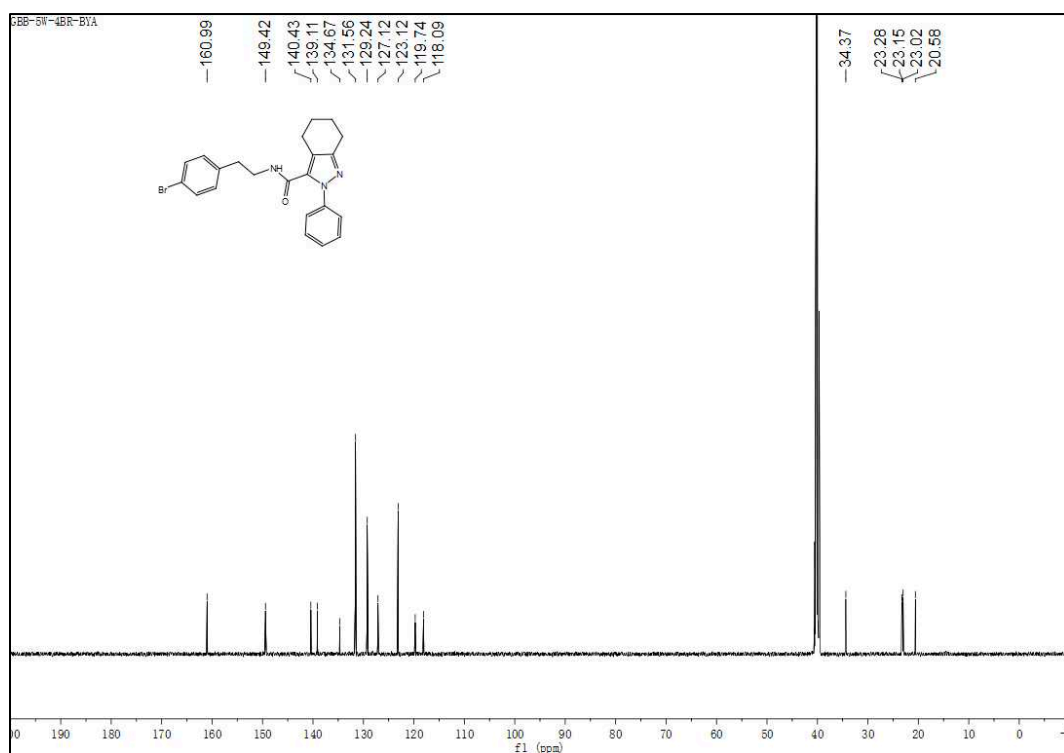

<sup>13</sup>C NMR spectra of compound **6u**

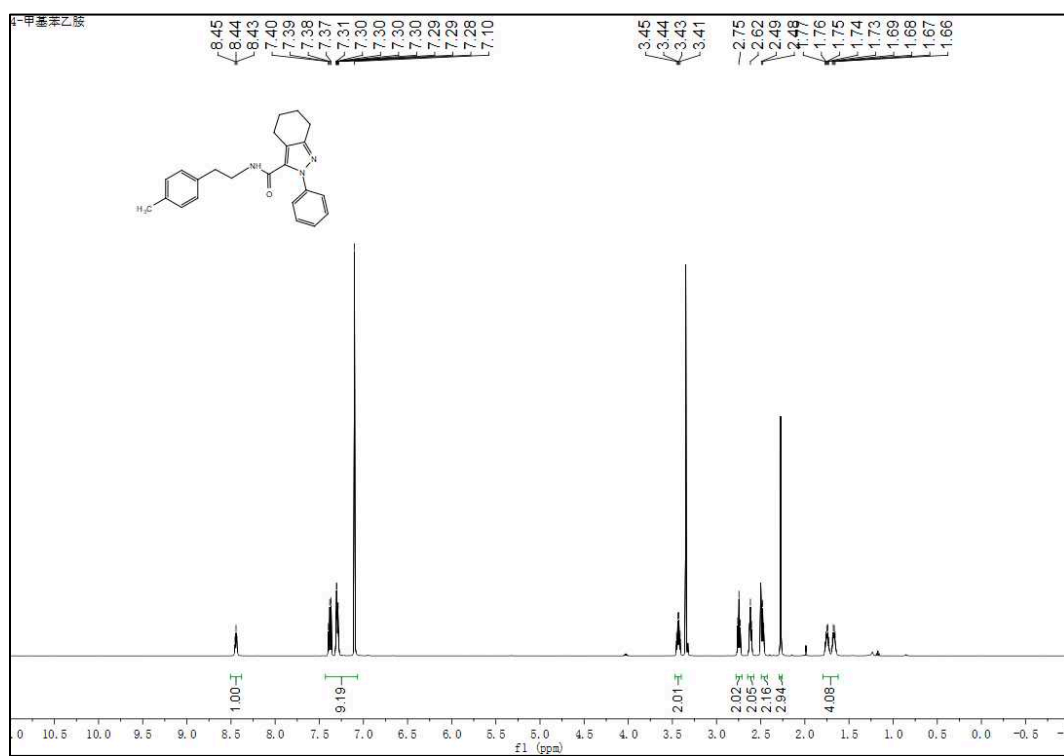

<sup>1</sup>H NMR spectra of compound **6v**

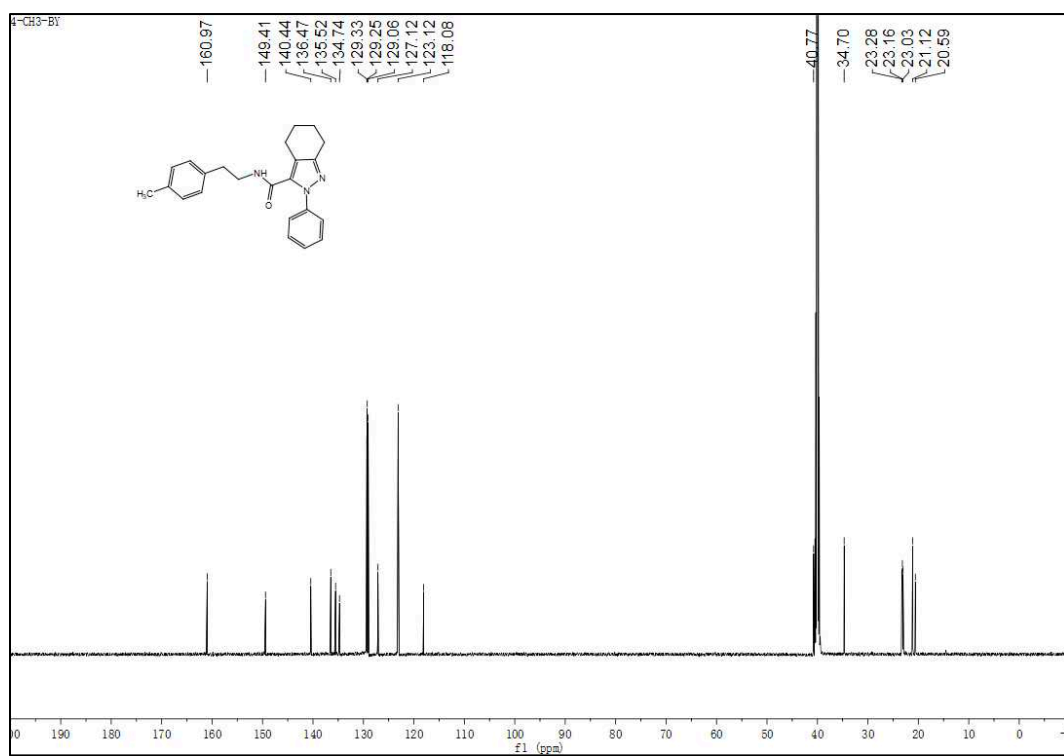

<sup>13</sup>C NMR spectra of compound **6v**

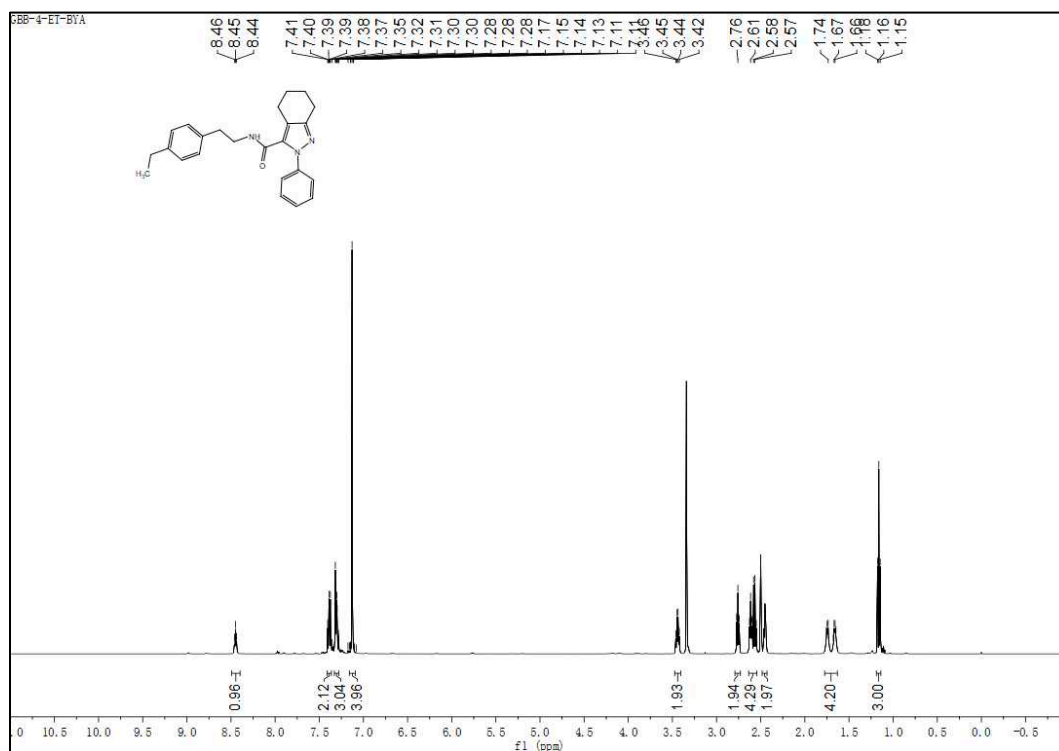

<sup>1</sup>H NMR spectra of compound **6w**

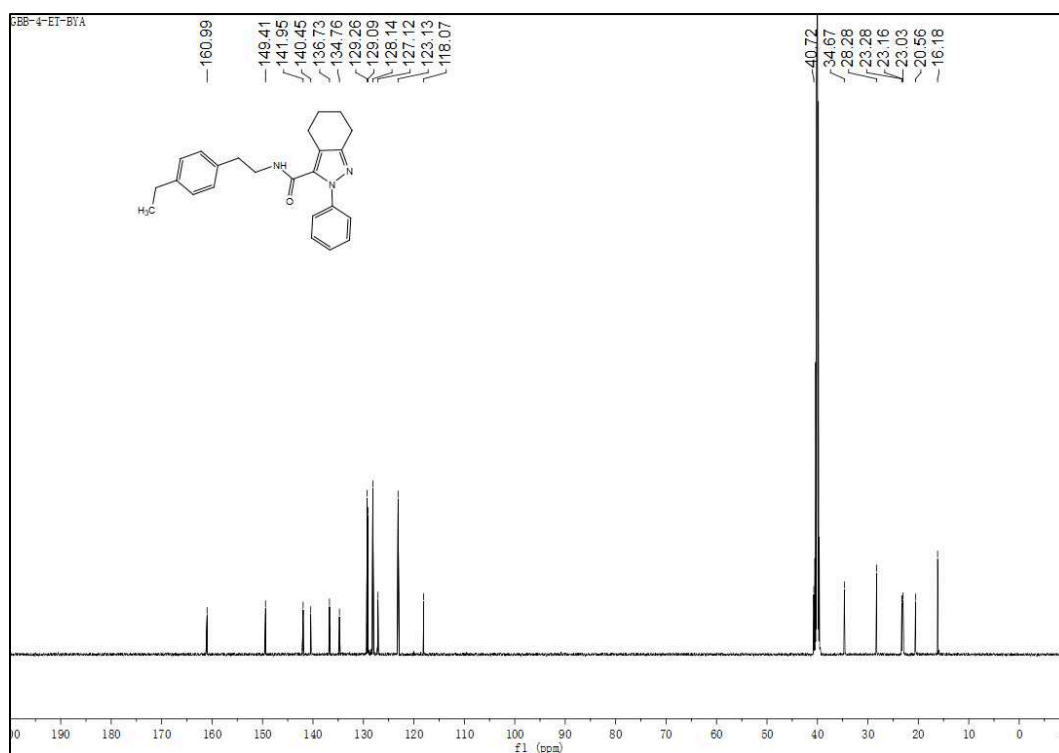

<sup>13</sup>C NMR spectra of compound **6w**

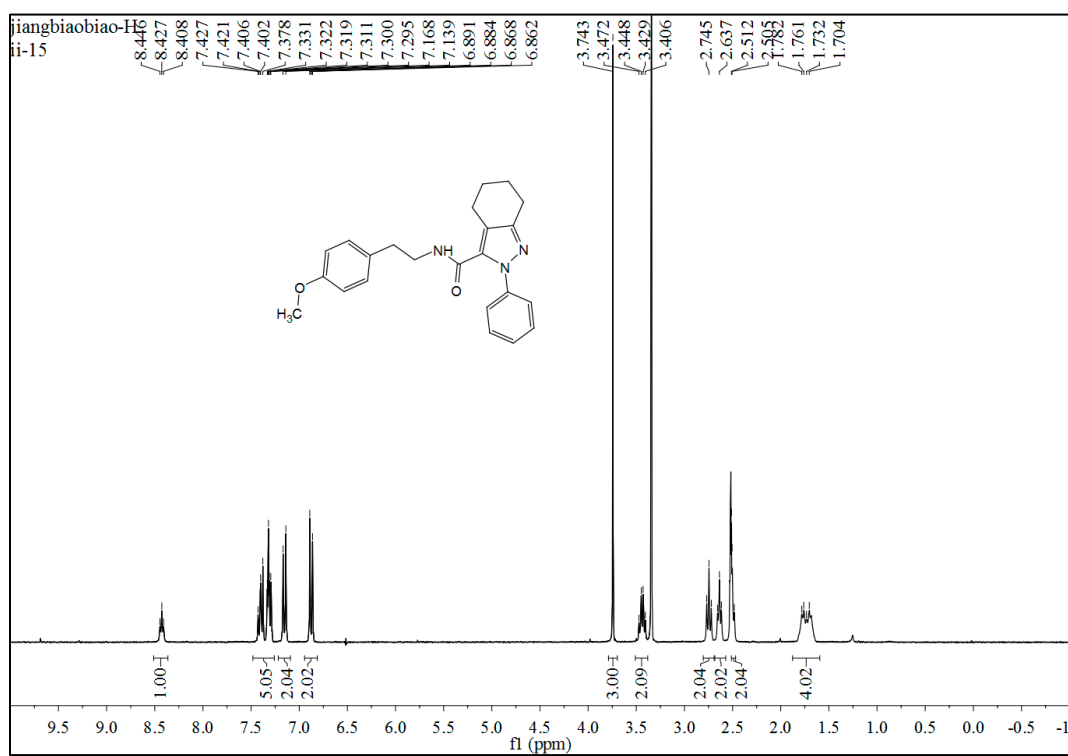

<sup>1</sup>H NMR spectra of compound 6x

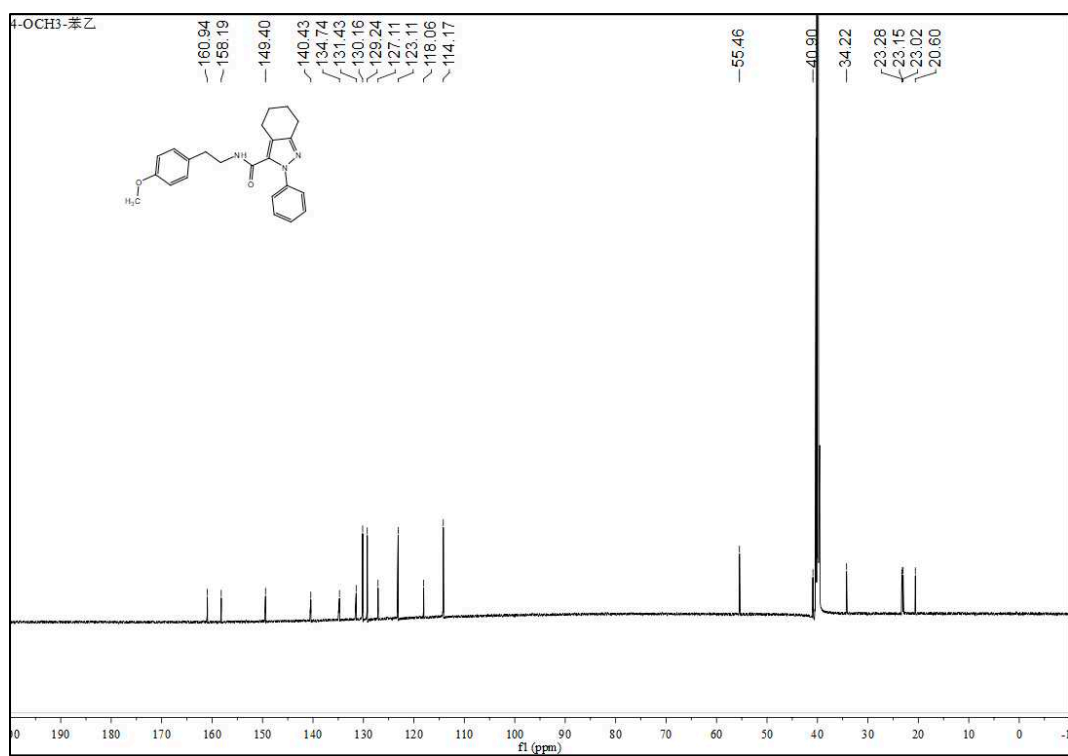

<sup>13</sup>C NMR spectra of compound 6x

### HRMS Spectrum of **6a**

| Sample No. | Formula (M)                                        | Ion Formula                                        | Measured m/z | Calc m/z | Diff (ppm) |
|------------|----------------------------------------------------|----------------------------------------------------|--------------|----------|------------|
| <b>6a</b>  | C <sub>20</sub> H <sub>18</sub> BrN <sub>3</sub> O | C <sub>20</sub> H <sub>19</sub> BrN <sub>3</sub> O | 396.0709     | 396.0706 | 0.76       |

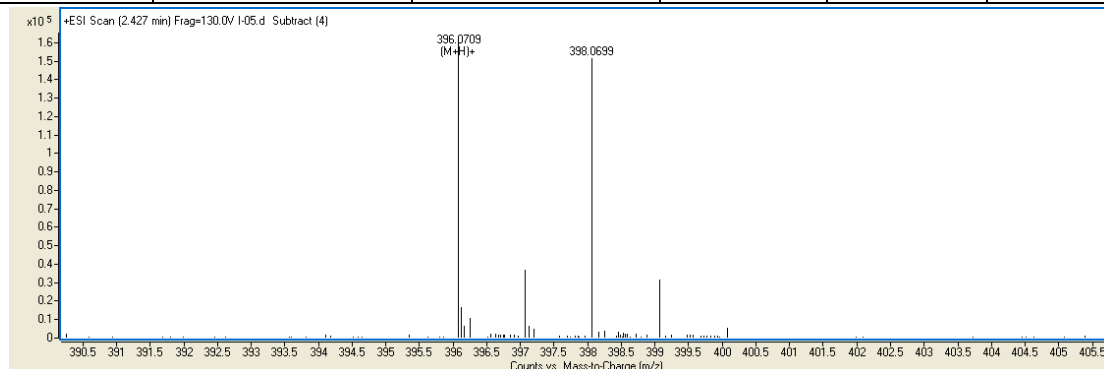

### HRMS Spectrum of **6b**

| Sample No. | Formula (M)                                        | Ion Formula                                        | Measured m/z | Calc m/z | Diff (ppm) |
|------------|----------------------------------------------------|----------------------------------------------------|--------------|----------|------------|
| <b>6b</b>  | C <sub>20</sub> H <sub>19</sub> BrN <sub>3</sub> O | C <sub>20</sub> H <sub>19</sub> BrN <sub>3</sub> O | 396.0706     | 396.0706 | 0          |

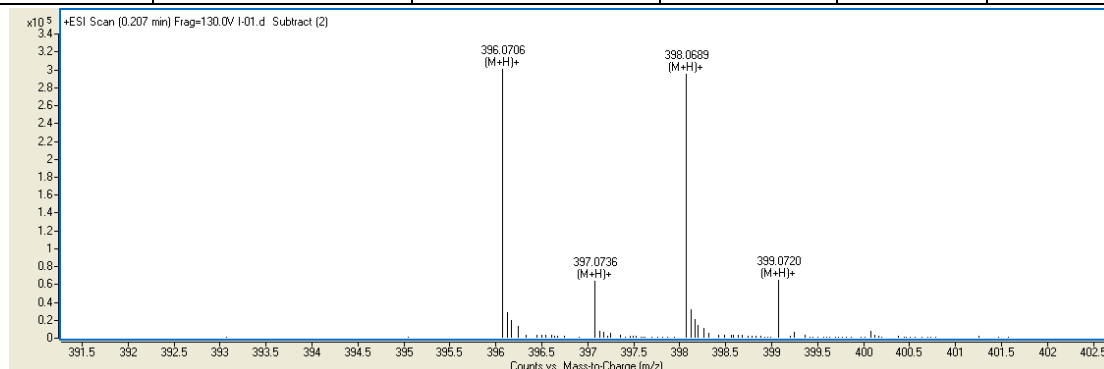

### HRMS Spectrum of **6c**

| Sample No. | Formula (M)                                      | Ion Formula                                      | Measured m/z | Calc m/z | Diff (ppm) |
|------------|--------------------------------------------------|--------------------------------------------------|--------------|----------|------------|
| <b>6c</b>  | C <sub>22</sub> H <sub>23</sub> N <sub>3</sub> O | C <sub>22</sub> H <sub>24</sub> N <sub>3</sub> O | 346.1916     | 346.1914 | 0.58       |

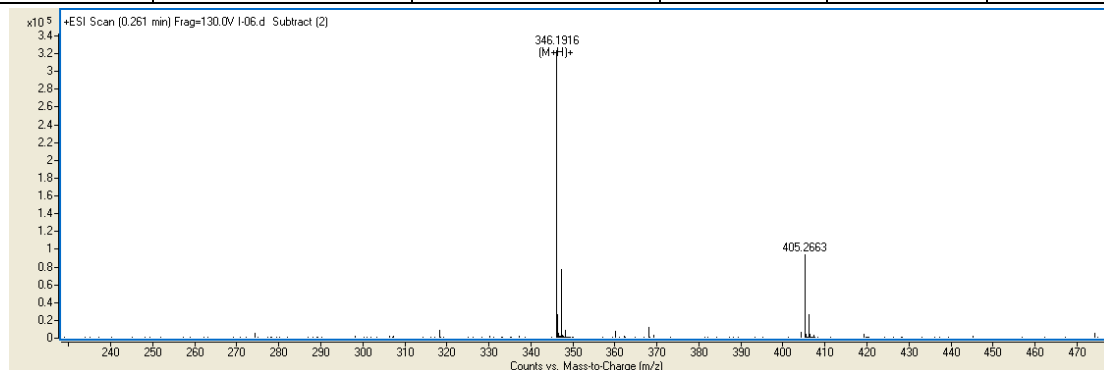



### HRMS Spectrum of **6d**

| Sample No. | Formula (M)                                      | Ion Formula                                      | Measured m/z | Calc m/z | Diff (ppm) |
|------------|--------------------------------------------------|--------------------------------------------------|--------------|----------|------------|
| <b>6d</b>  | C <sub>22</sub> H <sub>23</sub> N <sub>3</sub> O | C <sub>22</sub> H <sub>24</sub> N <sub>3</sub> O | 346.1915     | 346.1914 | 0.29       |

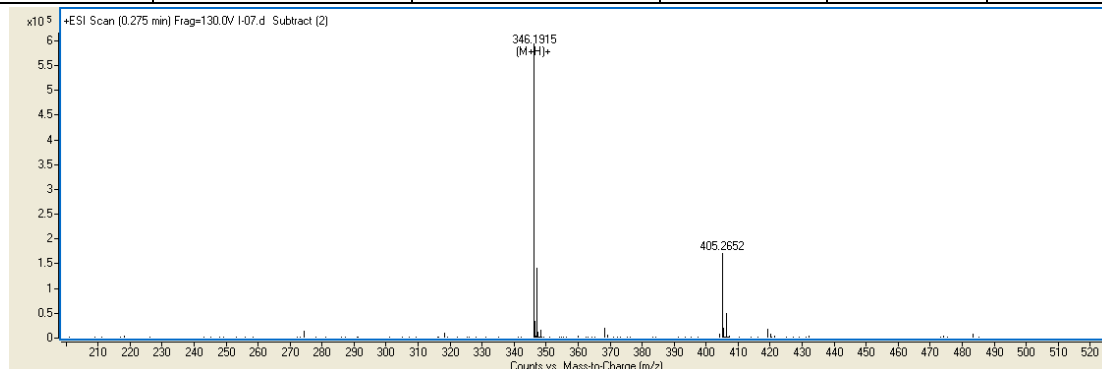

### HRMS Spectrum of **6e**

| Sample No. | Formula (M)                                                   | Ion Formula                                                   | Measured m/z | Calc m/z | Diff (ppm) |
|------------|---------------------------------------------------------------|---------------------------------------------------------------|--------------|----------|------------|
| <b>6e</b>  | C <sub>21</sub> H <sub>21</sub> N <sub>3</sub> O <sub>2</sub> | C <sub>21</sub> H <sub>21</sub> N <sub>3</sub> O <sub>2</sub> | 348.1708     | 348.1707 | 0.29       |

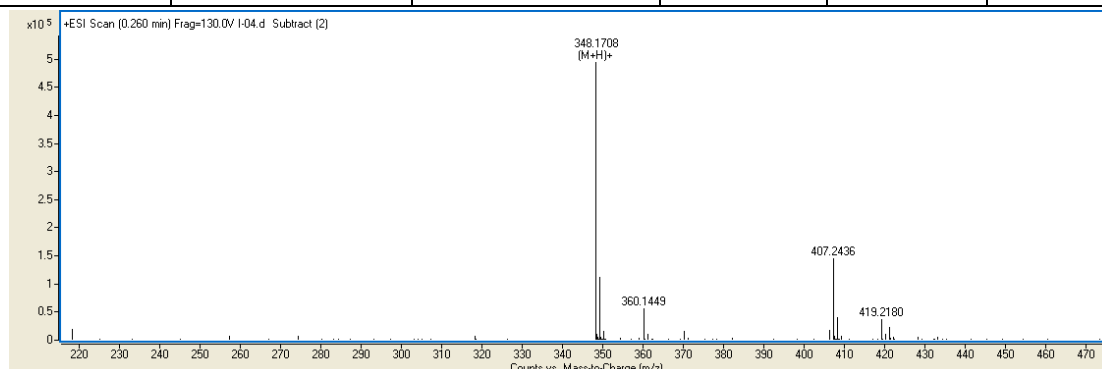

### HRMS Spectrum of **6f**

| Sample No. | Formula (M)                                      | Ion Formula                                      | Measured m/z | Calc m/z | Diff (ppm) |
|------------|--------------------------------------------------|--------------------------------------------------|--------------|----------|------------|
| <b>6f</b>  | C <sub>24</sub> H <sub>27</sub> N <sub>3</sub> O | C <sub>24</sub> H <sub>28</sub> N <sub>3</sub> O | 374.2224     | 374.2227 | 0.80       |

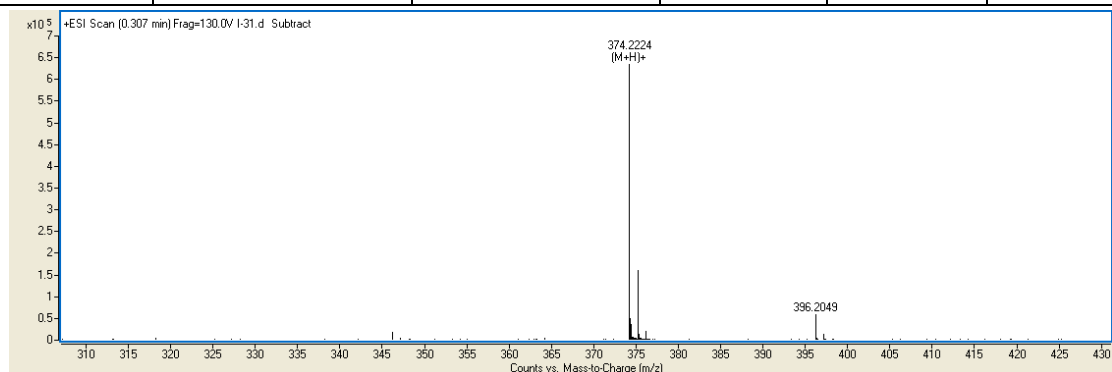

### HRMS Spectrum of **6g**

| Sample No. | Formula (M)                                       | Ion Formula                                       | Measured m/z | Calc m/z | Diff (ppm) |
|------------|---------------------------------------------------|---------------------------------------------------|--------------|----------|------------|
| <b>6g</b>  | C <sub>21</sub> H <sub>20</sub> FN <sub>3</sub> O | C <sub>21</sub> H <sub>21</sub> FN <sub>3</sub> O | 350.1661     | 350.1663 | 0.57       |

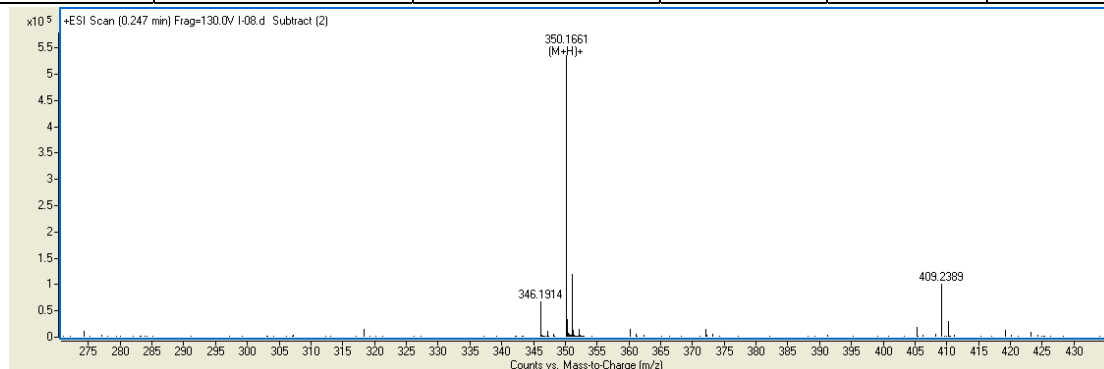

### HRMS Spectrum of **6h**

| Sample No. | Formula (M)                                       | Ion Formula                                       | Measured m/z | Calc m/z | Diff (ppm) |
|------------|---------------------------------------------------|---------------------------------------------------|--------------|----------|------------|
| <b>6h</b>  | C <sub>21</sub> H <sub>20</sub> FN <sub>3</sub> O | C <sub>21</sub> H <sub>21</sub> FN <sub>3</sub> O | 350.1665     | 350.1663 | 0.57       |

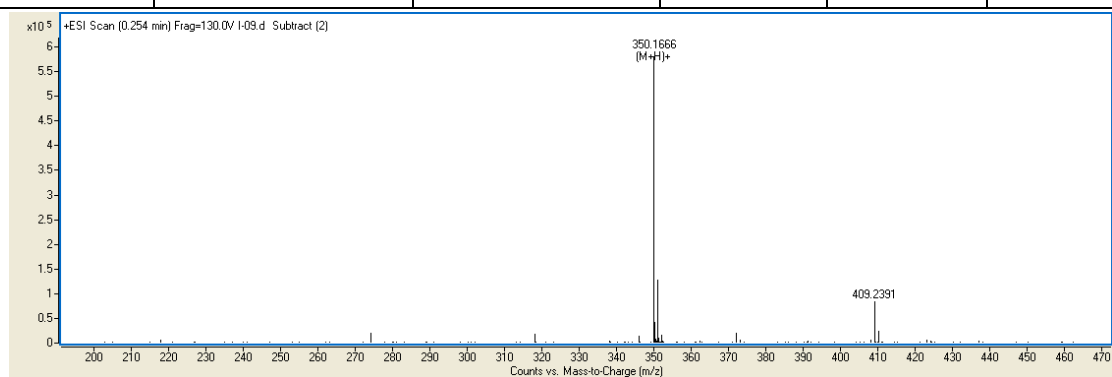

### HRMS Spectrum of **6i**

| Sample No. | Formula (M)                                        | Ion Formula                                        | Measured m/z | Calc m/z | Diff (ppm) |
|------------|----------------------------------------------------|----------------------------------------------------|--------------|----------|------------|
| <b>6i</b>  | C <sub>21</sub> H <sub>20</sub> BrN <sub>3</sub> O | C <sub>21</sub> H <sub>21</sub> BrN <sub>3</sub> O | 410.0859     | 410.0863 | 0.98       |

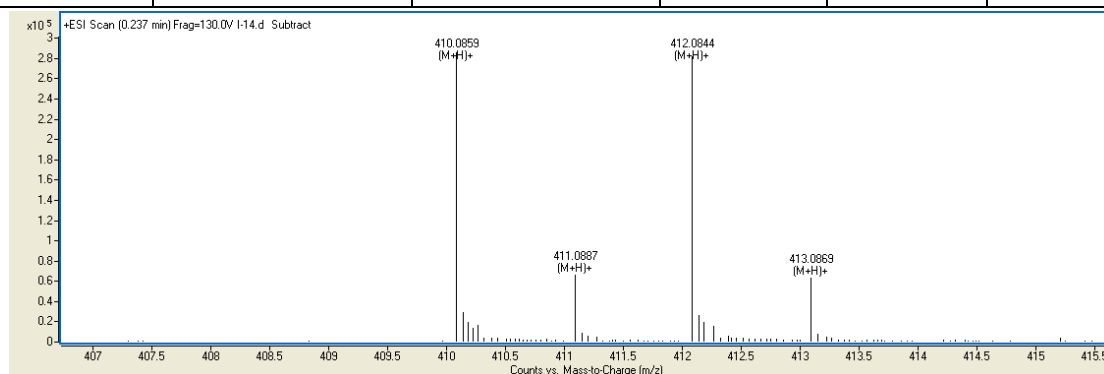

### HRMS Spectrum of **6j**

| Sample No. | Formula (M)                                        | Ion Formula                                        | Measured m/z | Calc m/z | Diff (ppm) |
|------------|----------------------------------------------------|----------------------------------------------------|--------------|----------|------------|
| <b>6j</b>  | C <sub>21</sub> H <sub>20</sub> BrN <sub>3</sub> O | C <sub>21</sub> H <sub>21</sub> BrN <sub>3</sub> O | 410.0864     | 410.0863 | 0.24       |

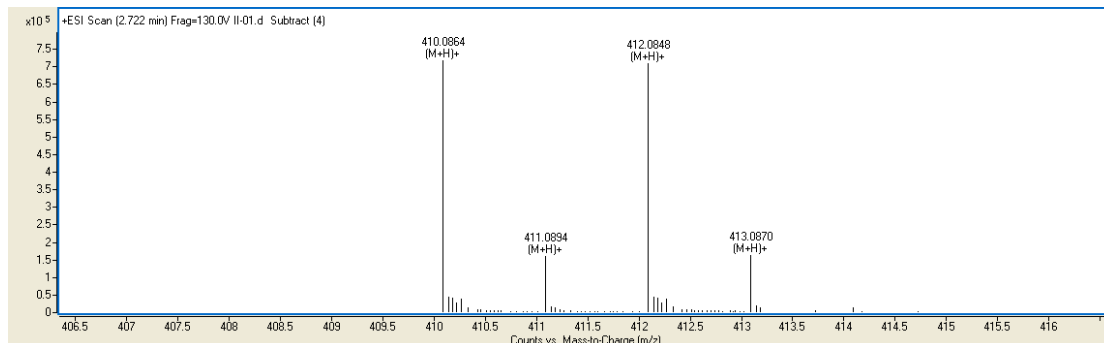

### HRMS Spectrum of **6k**

| Sample No. | Formula (M)                                                                  | Ion Formula                                                                  | Measured m/z | Calc m/z | Diff (ppm) |
|------------|------------------------------------------------------------------------------|------------------------------------------------------------------------------|--------------|----------|------------|
| <b>6k</b>  | C <sub>22</sub> H <sub>20</sub> F <sub>3</sub> N <sub>3</sub> O <sub>2</sub> | C <sub>22</sub> H <sub>21</sub> F <sub>3</sub> N <sub>3</sub> O <sub>2</sub> | 416.1583     | 416.1580 | 0.72       |

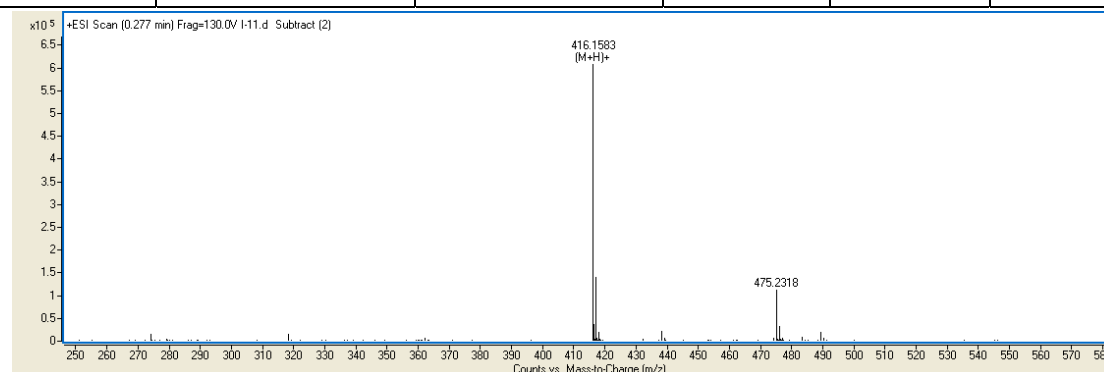

### HRMS Spectrum of **6l**

| Sample No. | Formula (M)                                                                  | Ion Formula                                                                  | Measured m/z | Calc m/z | Diff (ppm) |
|------------|------------------------------------------------------------------------------|------------------------------------------------------------------------------|--------------|----------|------------|
| <b>6l</b>  | C <sub>22</sub> H <sub>20</sub> F <sub>3</sub> N <sub>3</sub> O <sub>2</sub> | C <sub>22</sub> H <sub>21</sub> F <sub>3</sub> N <sub>3</sub> O <sub>2</sub> | 416.1583     | 416.1580 | 0.72       |

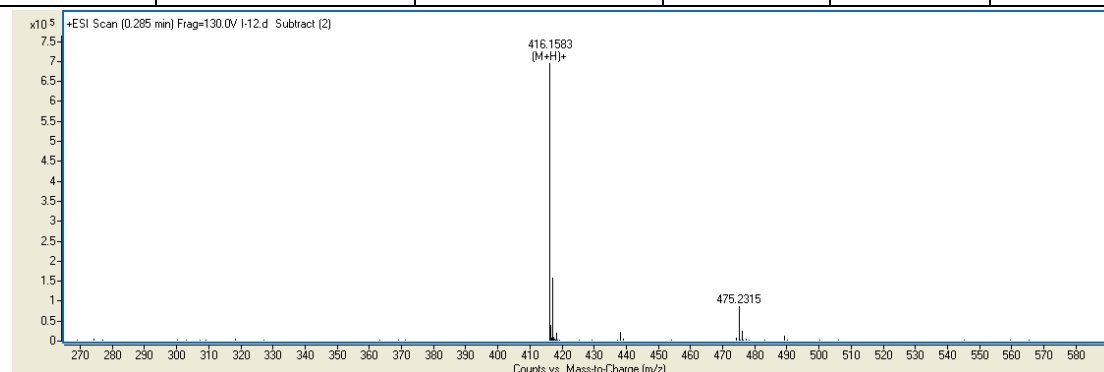

### HRMS Spectrum of **6m**

| Sample No. | Formula (M)                                      | Ion Formula                                      | Measured m/z | Calc m/z | Diff (ppm) |
|------------|--------------------------------------------------|--------------------------------------------------|--------------|----------|------------|
| <b>6m</b>  | C <sub>22</sub> H <sub>23</sub> N <sub>3</sub> O | C <sub>22</sub> H <sub>24</sub> N <sub>3</sub> O | 346.1915     | 346.1914 | 0.29       |

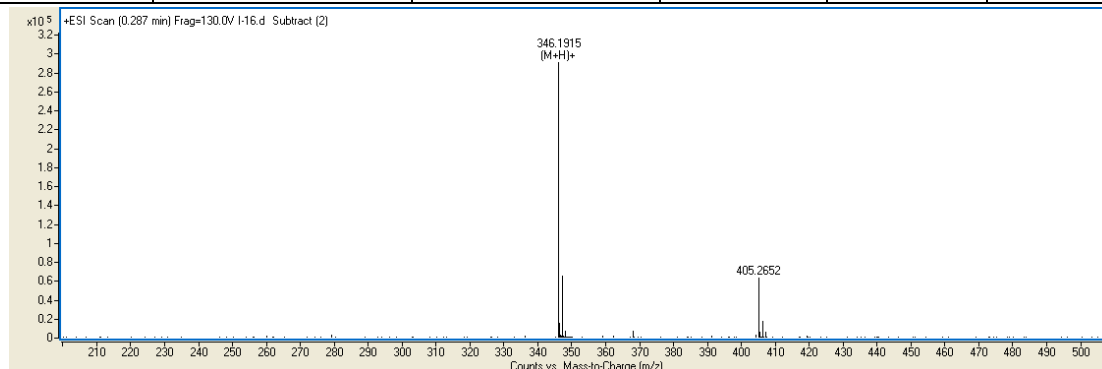

### HRMS Spectrum of **6n**

| Sample No. | Formula (M)                                      | Ion Formula                                      | Measured m/z | Calc m/z | Diff (ppm) |
|------------|--------------------------------------------------|--------------------------------------------------|--------------|----------|------------|
| <b>6n</b>  | C <sub>22</sub> H <sub>23</sub> N <sub>3</sub> O | C <sub>22</sub> H <sub>24</sub> N <sub>3</sub> O | 346.1913     | 346.1914 | 0.29       |

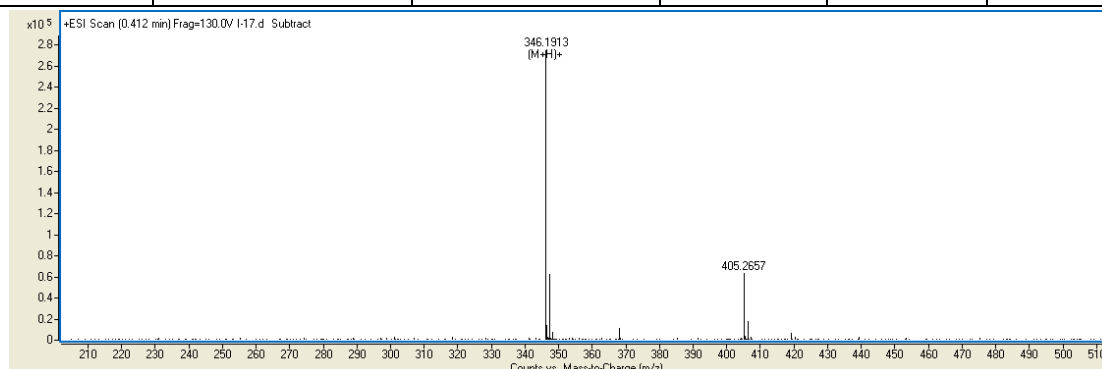

### HRMS Spectrum of **6o**

| Sample No. | Formula (M)                                      | Ion Formula                                      | Measured m/z | Calc m/z | Diff (ppm) |
|------------|--------------------------------------------------|--------------------------------------------------|--------------|----------|------------|
| <b>6o</b>  | C <sub>23</sub> H <sub>25</sub> N <sub>3</sub> O | C <sub>23</sub> H <sub>26</sub> N <sub>3</sub> O | 360.2071     | 360.2070 | 0.28       |

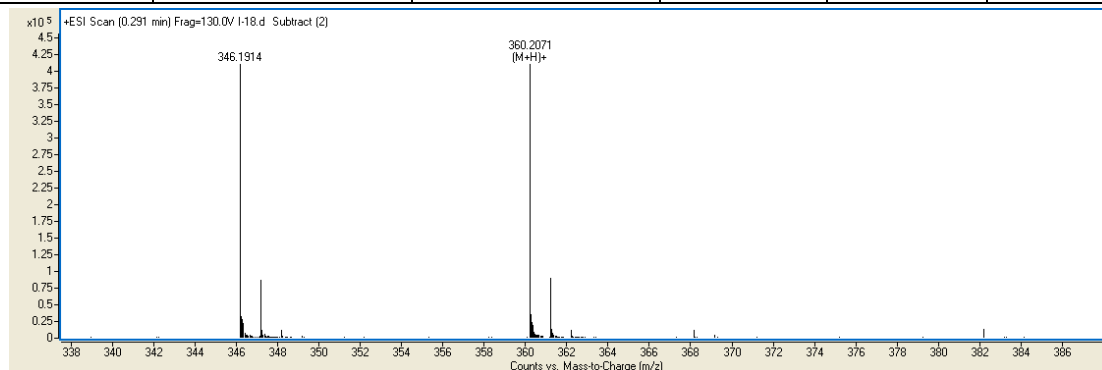

### HRMS Spectrum of **6p**

| Sample No. | Formula (M)                                                   | Ion Formula                                                   | Measured m/z | Calc m/z | Diff (ppm) |
|------------|---------------------------------------------------------------|---------------------------------------------------------------|--------------|----------|------------|
| <b>6p</b>  | C <sub>22</sub> H <sub>23</sub> N <sub>3</sub> O <sub>2</sub> | C <sub>22</sub> H <sub>24</sub> N <sub>3</sub> O <sub>2</sub> | 362.1864     | 362.1863 | 0.28       |

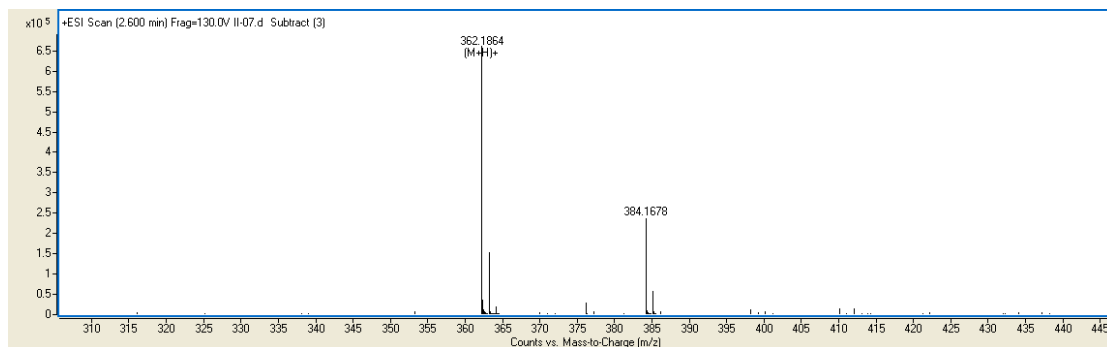

### HRMS Spectrum of **6q**

| Sample No. | Formula (M)                                      | Ion Formula                                      | Measured m/z | Calc m/z | Diff (ppm) |
|------------|--------------------------------------------------|--------------------------------------------------|--------------|----------|------------|
| <b>6q</b>  | C <sub>25</sub> H <sub>29</sub> N <sub>3</sub> O | C <sub>25</sub> H <sub>30</sub> N <sub>3</sub> O | 388.2382     | 388.2383 | 0.26       |

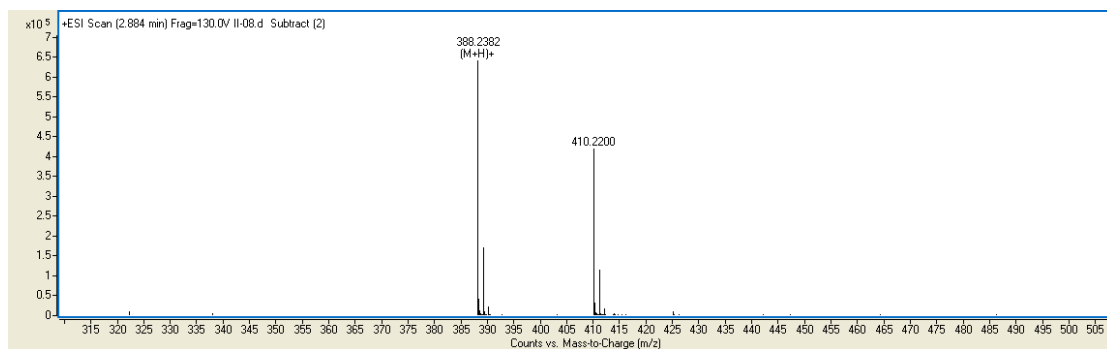

### HRMS Spectrum of **6r**

| Sample No. | Formula (M)                                       | Ion Formula                                       | Measured m/z | Calc m/z | Diff (ppm) |
|------------|---------------------------------------------------|---------------------------------------------------|--------------|----------|------------|
| <b>6r</b>  | C <sub>22</sub> H <sub>22</sub> FN <sub>3</sub> O | C <sub>22</sub> H <sub>23</sub> FN <sub>3</sub> O | 364.1821     | 364.1820 | 0.27       |

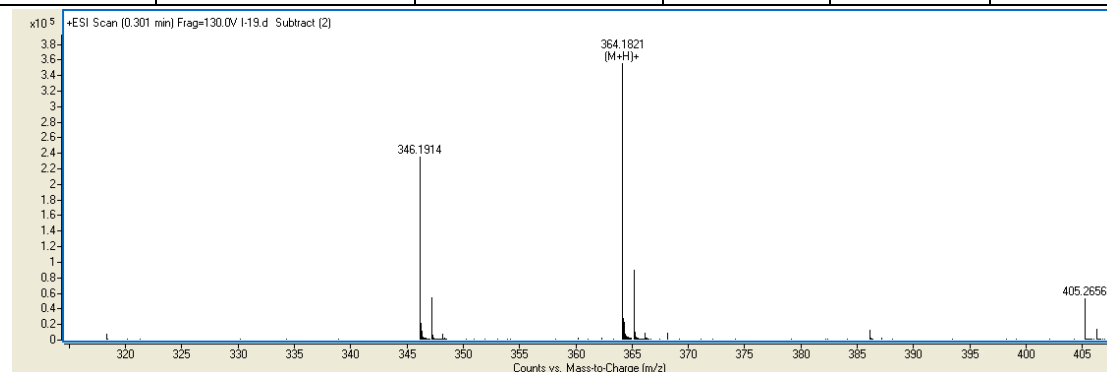

### HRMS Spectrum of **6s**

| Sample No. | Formula (M)                                       | Ion Formula                                       | Measured m/z | Calc m/z | Diff (ppm) |
|------------|---------------------------------------------------|---------------------------------------------------|--------------|----------|------------|
| <b>6s</b>  | C <sub>22</sub> H <sub>22</sub> FN <sub>3</sub> O | C <sub>22</sub> H <sub>23</sub> FN <sub>3</sub> O | 364.1821     | 364.1820 | 0.27       |

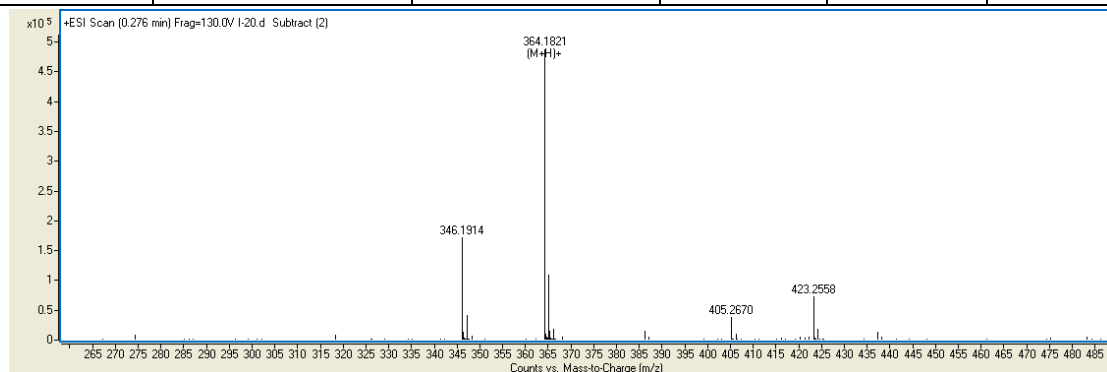

### HRMS Spectrum of **6t**

| Sample No. | Formula (M)                                        | Ion Formula                                        | Measured m/z | Calc m/z | Diff (ppm) |
|------------|----------------------------------------------------|----------------------------------------------------|--------------|----------|------------|
| <b>6t</b>  | C <sub>22</sub> H <sub>22</sub> BrN <sub>3</sub> O | C <sub>22</sub> H <sub>23</sub> BrN <sub>3</sub> O | 424.1020     | 424.1019 | 0.24       |

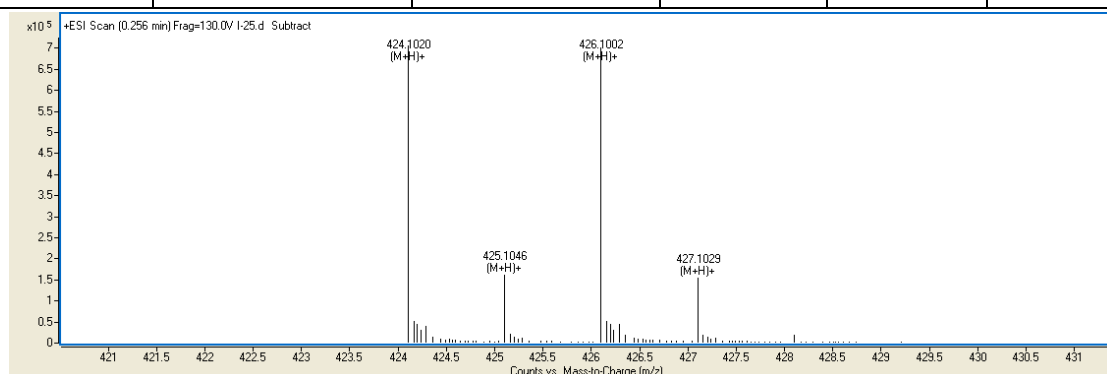

### HRMS Spectrum of **6u**

| Sample No. | Formula (M)                                        | Ion Formula                                        | Measured m/z | Calc m/z | Diff (ppm) |
|------------|----------------------------------------------------|----------------------------------------------------|--------------|----------|------------|
| <b>6u</b>  | C <sub>22</sub> H <sub>22</sub> BrN <sub>3</sub> O | C <sub>22</sub> H <sub>23</sub> BrN <sub>3</sub> O | 424.1019     | 424.1019 | 0          |

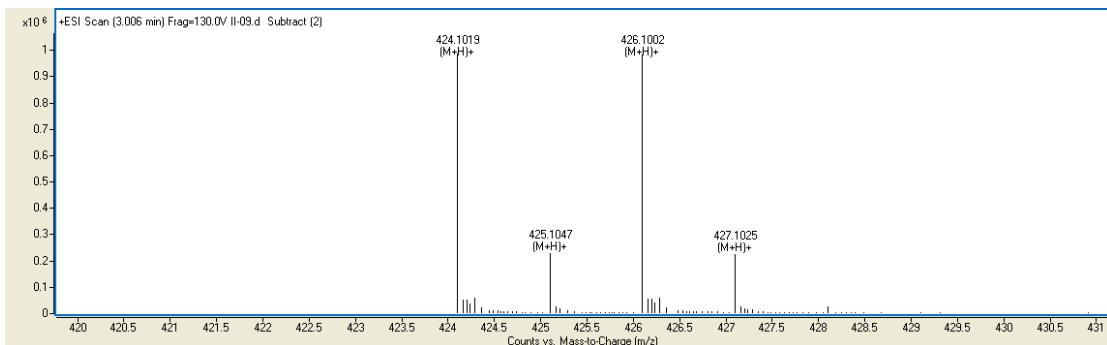

### HRMS Spectrum of **6v**

| Sample No. | Formula (M)                                      | Ion Formula                                      | Measured m/z | Calc m/z | Diff (ppm) |
|------------|--------------------------------------------------|--------------------------------------------------|--------------|----------|------------|
| <b>6v</b>  | C <sub>23</sub> H <sub>25</sub> N <sub>3</sub> O | C <sub>23</sub> H <sub>26</sub> N <sub>3</sub> O | 360.2069     | 360.2070 | 0.28       |

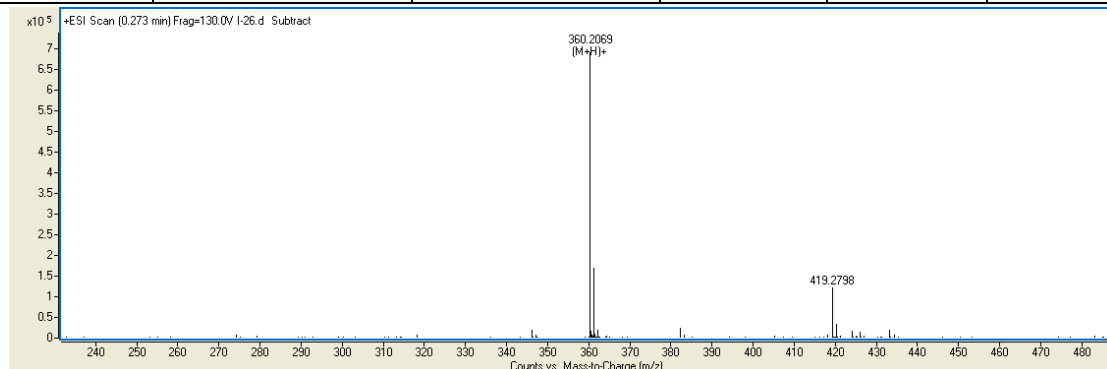

### HRMS Spectrum of **6w**

| Sample No. | Formula (M)                                      | Ion Formula                                      | Measured m/z | Calc m/z | Diff (ppm) |
|------------|--------------------------------------------------|--------------------------------------------------|--------------|----------|------------|
| <b>6w</b>  | C <sub>24</sub> H <sub>27</sub> N <sub>3</sub> O | C <sub>24</sub> H <sub>28</sub> N <sub>3</sub> O | 374.2229     | 374.2227 | 0.53       |

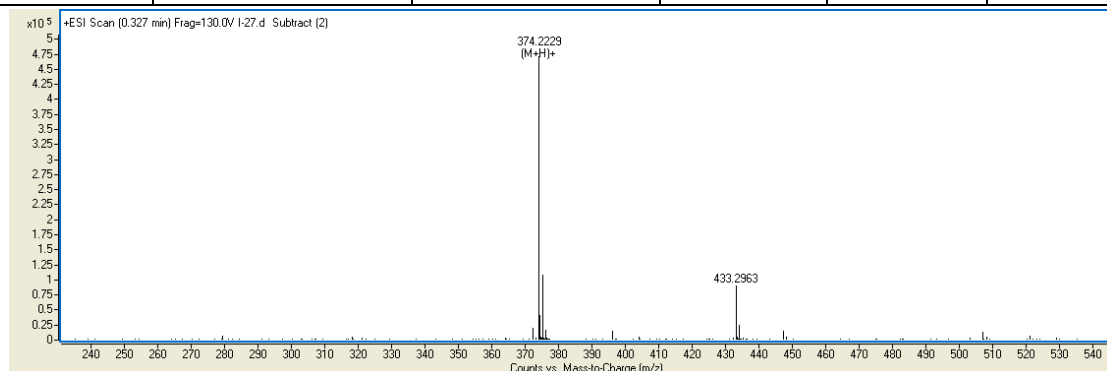

### HRMS Spectrum of **6x**

| Sample No. | Formula (M)                                                   | Ion Formula                                                     | Measured m/z | Calc m/z | Diff (ppm) |
|------------|---------------------------------------------------------------|-----------------------------------------------------------------|--------------|----------|------------|
| <b>6x</b>  | C <sub>23</sub> H <sub>25</sub> N <sub>3</sub> O <sub>2</sub> | C <sub>23</sub> H <sub>25</sub> N <sub>3</sub> NaO <sub>2</sub> | 398.1840     | 398.1839 | 0.25       |

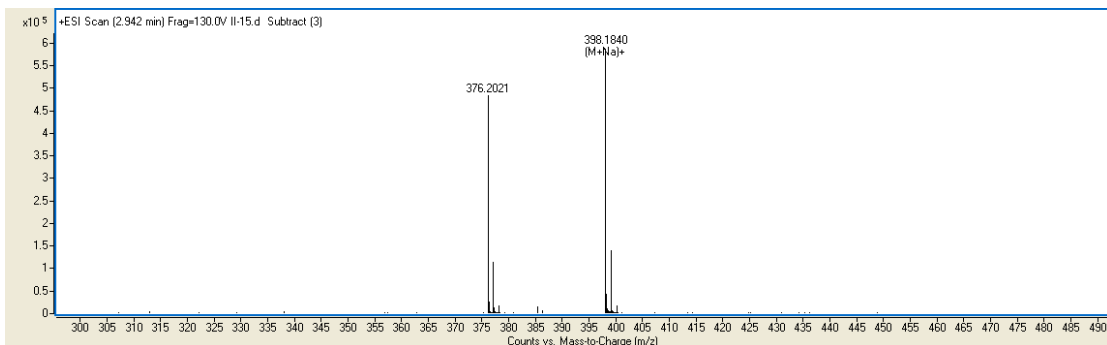

Supplement: s1 [file s1]
